# Supplementary material for: Restriction of HIV-1 Escape by a Highly Broad and Potent Neutralizing Antibody
Source: PubMed Central journal article supplement (PMC7042716; doi:10.1016/j.cell.2020.01.010), 2020-02-06
Supplement: mmc1.pdf [file mmc1.pdf]

**Cell, Volume 180**

## **Supplemental Information**

### **Restriction of HIV-1 Escape**

#### **by a Highly Broad and Potent Neutralizing Antibody**

**Philipp Schommers, Henning Gruell, Morgan E. Abernathy, My-Kim Tran, Adam S. Dingens, Harry B. Gristick, Christopher O. Barnes, Till Schoofs, Maike Schlotz, Kanika Vanshylla, Christoph Kreer, Daniela Weiland, Udo Holtick, Christof Scheid, Markus M. Valter, Marit J. van Gils, Rogier W. Sanders, Jörg J. Vehreschild, Oliver A. Cornely, Clara Lehmann, Gerd Fätkenheuer, Michael S. Seaman, Jesse D. Bloom, Pamela J. Bjorkman, and Florian Klein**

**Table S1. HIV-1-Reactive Antibody Clones Isolated by Single Cell Cloning from Individual IDC561, Related to Figure 1**

| Clone | Antibody  | Heavy Chain    |                |                |                             |        | Light Chain        |          |          |                |              | Activity    |                    |                                 | Single Cell Sort Summary by Clone |                   |          |        |       |       |
|-------|-----------|----------------|----------------|----------------|-----------------------------|--------|--------------------|----------|----------|----------------|--------------|-------------|--------------------|---------------------------------|-----------------------------------|-------------------|----------|--------|-------|-------|
|       |           | Genes          |                |                | CDRH3                       | Length | Notes              | Genes    |          |                | CDRL3        | Length      | Notes              | Binding (ELISA)<br>BG505* YU2** | Neutralization<br>Global panel*** | Identifying Baits |          |        |       |       |
|       |           | V <sub>H</sub> | D <sub>H</sub> | J <sub>H</sub> |                             |        |                    | Sequence | κ/λ      | V <sub>L</sub> |              |             |                    |                                 |                                   | J <sub>L</sub>    | Sequence | Length | Notes | Clone |
| 1     | 561_01_35 | 1-2*02         | 6-19*01        | 4*02           | ARDRPSVGGWYVPGSD            | 16 aa  |                    |          | λ        | 1-47*01        | 3*02         | ASWDDRLSVGV | 11 aa              | -                               | -                                 | -                 | 1        | 2      | +     | -     |
| 2     | 561_09_03 | 1-69*01        | 6-19*01        | 2*01           | AREGGSPVAIYVFFDV            | 17 aa  |                    |          | λ        | 1-40*01        | 1*01         | QSYDGNFV    | 9 aa               | -                               | -                                 | -                 | 2        | 18     | +     | -     |
| 3     | 561_01_05 | 4-4*07         | 2-8*01         | 2*01           | VDRDRPILIGAVPRFDF           | 17 aa  |                    |          | κ        | 2-29*02        | 2*01         | MQGILYPT    | 9 aa               | -                               | -                                 | -                 | 3        | 106    | +     | -     |
| 4.1   | 561_01_18 | 1-46*01        | 3-10*01        | 6*03           | ARDPFGDRAPHYNYHMDV          | 18 aa  | 6 aa ins. in CDRH1 | κ        | 3-20*01  | 3*01           | QRYGGTPIT    | 9 aa        | +                  | +                               | +                                 | 4.1               | 37       | +      | +     |       |
| 4.1   | 561_01_21 | 1-46*01        | 5-24*01        | 6*03           | ARDPFGDMYPHYNYHMDV          | 18 aa  | 6 aa ins. in CDRH1 | κ        | 3-20*01  | 3*01           | QRYGGTPIT    | 9 aa        | +                  | +                               | +                                 |                   |          |        |       |       |
| 4.1   | 561_01_33 | 1-46*01        | 3-10*01        | 6*03           | ARDPFGDMYPHYNYHMDV          | 18 aa  | 6 aa ins. in CDRH1 | κ        | 3-20*01  | 3*01           | QRYGGTPIT    | 9 aa        | +                  | +                               | +                                 |                   |          |        |       |       |
| 4.1   | 561_01_54 | 1-46*01        | 3-10*01        | 6*03           | ARDPFGDMYPHYNSHMDV          | 18 aa  | 6 aa ins. in CDRH1 | κ        | 3-20*01  | 3*01           | QRYGGTPIT    | 9 aa        | +                  | +                               | +                                 |                   |          |        |       |       |
| 4.1   | 561_01_55 | 1-46*01        | 3-10*01        | 6*03           | ARDPFGDMYPHYNYHMDV          | 18 aa  | 6 aa ins. in CDRH1 | κ        | 3-20*01  | 3*01           | QRYGGTPIT    | 9 aa        | +                  | +                               | +                                 |                   |          |        |       |       |
| 4.1   | 561_02_10 | 1-46*01        | 3-10*01        | 6*03           | ARDPFGNMPHYNYHMDV           | 18 aa  | 6 aa ins. in CDRH1 | κ        | 3-20*01  | 4*01           | QRYGGTPIT    | 9 aa        | +                  | +                               | +                                 |                   |          |        |       |       |
| 4.1   | 561_02_22 | 1-46*01        | 3-10*01        | 6*03           | ARDPFGDMYPHYNYHMDV          | 18 aa  | 6 aa ins. in CDRH1 | κ        | 3-20*01  | 3*01           | QRYGGTPIT    | 9 aa        | +                  | +                               | +                                 |                   |          |        |       |       |
| 4.1   | 561_02_27 | 1-46*01        | 3-10*01        | 6*03           | ARDPFGDMYPHYNYHMDV          | 18 aa  | 6 aa ins. in CDRH1 | κ        | 3-20*01  | 3*01           | QRYGGTPIT    | 9 aa        | +                  | +                               | +                                 |                   |          |        |       |       |
| 4.1   | 561_02_47 | 1-46*01        | 3-10*01        | 6*03           | ARDPFGDMYPHYNYHMDV          | 18 aa  | 6 aa ins. in CDRH1 | κ        | 3-20*01  | 3*01           | QRYGGTPIT    | 9 aa        | +                  | +                               | +                                 |                   |          |        |       |       |
| 4.1   | 561_03_59 | 1-46*01        | 3-10*01        | 6*03           | ARDPFGDRAPHYNYHMDV          | 18 aa  | 6 aa ins. in CDRH1 | κ        | 3-20*01  | 4*01           | QRYGATPIT    | 9 aa        | +                  | +                               | +                                 |                   |          |        |       |       |
| 4.1   | 561_05_18 | 1-46*01        | 5-24*01        | 6*03           | ARDPFGDMYPHYNYHMDV          | 18 aa  | 6 aa ins. in CDRH1 | κ        | 3-20*01  | 4*01           | QRYGGTPIT    | 9 aa        | +                  | +                               | +                                 |                   |          |        |       |       |
| 4.1   | 561_08_10 | 1-46*01        | 3-10*01        | 6*03           | ARDPFGDRAPHYNYHMDV          | 18 aa  | 6 aa ins. in CDRH1 | κ        | 3-20*01  | 4*01           | QRYGGTPIT    | 9 aa        | +                  | +                               | +                                 |                   |          |        |       |       |
| 4.1   | 561_09_23 | 1-46*01        | 3-10*01        | 6*03           | ARDPFGERAPHYNYHMDV          | 18 aa  | 6 aa ins. in CDRH1 | κ        | 3-20*01  | 4*01           | QRFGATPIT    | 9 aa        | +                  | +                               | +                                 |                   |          |        |       |       |
| 4.1   | 561_10_07 | 1-46*01        | 3-10*01        | 6*03           | ARDPFGDRAPHYNYHMDV          | 18 aa  | 6 aa ins. in CDRH1 | κ        | 3-20*01  | 4*01           | QRYGGTPIT    | 9 aa        | +                  | +                               | +                                 |                   |          |        |       |       |
| 4.2   | 561_08_52 | 1-46*01        | 6-13*01        | 6*03           | ARDPLGEKSPAYSHHMDV          | 18 aa  | 2 aa del. in FWR1  | κ        | 3-20*01  | 4*01           | QTYGATPIT    | 10 aa       | 2 aa ins. in FWR3  | +                               | +                                 |                   |          |        |       | +     |
| 4.2   | 561_09_89 | 1-46*01        | 1-26*01        | 6*03           | ARDPLGEKSPAYSHHMDV          | 18 aa  | 2 aa del. in FWR1  | κ        | 3-20*01  | 4*01           | QTYGATPIT    | 10 aa       | 2 aa ins. in FWR3  | +                               | +                                 |                   |          |        |       | +     |
| 4.3   | 561_09_71 | 1-46*01        | 3-16*01        | 6*04           | ARDSFGETFRRHSGDQPYQMDV      | 21 aa  | 2 aa del. in FWR1  | κ        | 3-20*01  | 4*01           | QSYGSITPLI   | 10 aa       | +                  | +                               | +                                 |                   |          |        |       |       |
| 4.4   | 561_01_23 | 1-46*01        | 3-16*01        | 6*04           | ARDSFGETFRRHSGDQPYQMDV      | 20 aa  | 2 aa del. in FWR1  | κ        | 3-20*01  | 4*01           | QSYGSITPLV   | 10 aa       | +                  | +                               | +                                 |                   |          |        |       |       |
| 4.4   | 561_01_29 | 1-46*01        | 3-16*01        | 6*04           | ARDSFGETFRRHSGDQPYQMDL      | 20 aa  | 2 aa del. in FWR1  | κ        | 3-20*01  | 4*01           | QSYGSITPLV   | 10 aa       | +                  | +                               | +                                 |                   |          |        |       |       |
| 4.4   | 561_02_12 | 1-46*01        | 3-16*01        | 6*04           | ARDPFGETFRGHDPYRMDV         | 20 aa  | 2 aa del. in FWR1  | κ        | 3-20*01  | 4*01           | QSYGSITPLV   | 10 aa       | +                  | +                               | +                                 |                   |          |        |       |       |
| 4.4   | 561_02_21 | 1-46*01        | 3-16*01        | 6*04           | ARDPFGETFRGREQPYQMDV        | 20 aa  | 2 aa del. in FWR1  | κ        | 3-20*01  | 4*01           | QSYGPITPLV   | 10 aa       | +                  | +                               | +                                 |                   |          |        |       |       |
| 4.4   | 561_03_07 | 1-46*01        | 3-16*01        | 6*04           | ARDPFGETFRGHDPYRMDV         | 20 aa  | 2 aa del. in FWR1  | κ        | 3-20*01  | 4*01           | QSYGSITPLV   | 10 aa       | +                  | +                               | +                                 |                   |          |        |       |       |
| 4.4   | 561_03_78 | 1-46*01        | 3-16*01        | 6*04           | ARDPFGETFRGHDPYQMDV         | 20 aa  | 2 aa del. in FWR1  | κ        | 3-20*01  | 4*01           | QSYGSITPLV   | 10 aa       | +                  | +                               | +                                 |                   |          |        |       |       |
| 6     | 561_01_30 | 3-30*18        | 4-17*01        | 6*03           | VKDGEVDYGDYAYYYMDV          | 21 aa  |                    | λ        | 1-47*01  | 1*01           | AAWDDSLSGRYV | 12 aa       | -                  | -                               | -                                 | 6                 | 2        | +      | -     |       |
| 7     | 561_01_50 | 3-13*01        | 3-3*01         | 6*03           | TRGEAPYDFWGGHLDYHYFYMDI     | 23 aa  |                    | κ        | 2-30*02  | 2*01           | MQASHWPHA    | 9 aa        | +                  | +                               | +                                 | 7                 | 17       | +      | +     |       |
| 8     | 561_01_02 | 5-51*01        | 5-24*01        | 3*02           | ARPLCGQDVTCINAFDI           | 17 aa  |                    | κ        | 4-1*01   | 2*01           | EQFYDTPYT    | 9 aa        | +                  | +                               | +                                 | 8                 | 12       | +      | +     |       |
| 8     | 561_02_17 | 5-51*01        | 5-24*01        | 3*02           | ARPLCGQDVTCINAFDI           | 17 aa  |                    | κ        | 4-1*01   | 2*01           | EQFYDTPYT    | 9 aa        | +                  | +                               | +                                 | 8                 | 12       | +      | +     |       |
| 9     | 561_02_32 | 4-34*01        | 3-10*01        | 6*03           | VRYYLPHMDV                  | 10 aa  |                    | κ        | 2-24*01  | 2*01           | MQASQFPHT    | 9 aa        | 2 aa del. in FWR1  | -                               | -                                 | -                 | 9        | 7      | +     | -     |
| 10    | 561_08_24 | 1-69*01        | 1-26*01        | 6*02           | AVGSNVNGFFHMDH              | 14 aa  | 6 aa del. in FWR3  | λ        | 3-10*01  | 2*01           | YLADRNNMGI   | 11 aa       | +                  | +                               | +                                 | 10                | 8        | +      | -     |       |
| 11    | 561_02_73 | 1-69*01        | 2-21*02        | 6*03           | VRGDVGGSVLTETDYQQMDV        | 24 aa  |                    | κ        | 3-15*01  | 2*03           | QYNNWPPYS    | 10 aa       | +                  | +                               | +                                 | 11                | 9        | +      | +     |       |
| 13    | 561_05_16 | 1-18*01        | 2-8*02         | 4*02           | ARDLNYPFCTETTCYETLAY        | 20 aa  |                    | κ        | 1-39*01  | 2*01           | QQSYTPYT     | 9 aa        | +                  | +                               | +                                 | 13                | 5        | -      | +     |       |
| 14    | 561_05_75 | 1-2*02         | 3-3*01         | 6*03           | ARAKTATMFIIRNPKSGNNYMDA     | 24 aa  |                    | κ        | 3-20*01  | 4*01           | QQYATSVT     | 8 aa        | -                  | +                               | -                                 | 14                | 5        | +      | +     |       |
| 17    | 561_05_54 | 1-69*01        | 3-9*01         | 4*02           | EGRYKYGSSSTSGPFD            | 17 aa  |                    | κ        | 1-33*01  | 3*01           | QQYDNIIPRAT  | 11 aa       | +                  | +                               | -                                 | 17                | 4        | -      | +     |       |
| 18    | 561_05_11 | 1-69*01        | 3-9*01         | 4*02           | VGRYKYRSASTSGPFD            | 17 aa  |                    | κ        | 1-33*01  | 3*01           | QQCDNIIPRAT  | 11 aa       | +                  | +                               | -                                 | 18                | 8        | -      | +     |       |
| 20    | 561_02_33 | 1-69*01        | 3-9*01         | 4*02           | VARYKQHGNSGPFD              | 16 aa  |                    | κ        | 1-33*01  | 3*01           | QQYDNIIPRAT  | 11 aa       | +                  | +                               | -                                 | 20                | 21       | +      | +     |       |
| 21    | 561_05_02 | 1-69*01        | 3-3*01         | 3*02           | ARNTISNGDDAFDI              | 15 aa  |                    | λ        | 2-8*01   | 2*01           | GSLVGNWDVI   | 10 aa       | 6 aa del. in CDRL1 | -                               | -                                 | -                 | 21       | 5      | -     | +     |
| 22    | 561_05_44 | 1-69*11        | 5-18*01        | 6*03           | ARSSLVTVMDEAELEEESHYYMDV    | 26 aa  |                    | κ        | 4-1*01   | 4*01           | HQYNTPLT     | 9 aa        | +                  | +                               | +                                 | 22                | 13       | -      | +     |       |
| 23    | 561_06_44 | 1-69*12        | 3-10*01        | 6*03           | ARGSDVTVLEFETERLEENYYYYMDV  | 26 aa  |                    | κ        | 4-1*01   | 4*01           | QQYFSIPLT    | 9 aa        | +                  | +                               | +                                 | 23                | 3        | -      | +     |       |
| 24    | 561_05_83 | 3-23*01        | 4-17*01        | 4*02           | ARGPLLRFFDL                 | 11 aa  |                    | λ        | 2-23*02  | 2*01           | SSYARGTSFL   | 10 aa       | +                  | +                               | +                                 | 24                | 6        | -      | +     |       |
| 25    | 561_06_09 | 3-23*04        | 3-10*01        | 4*02           | TKDQGLLRAHDY                | 12 aa  |                    | λ        | 2-14*01  | 2*01           | SSYTSRSTSS   | 10 aa       | +                  | +                               | -                                 | 25                | 6        | -      | +     |       |
| 26    | 561_05_65 | 3-23*04        | 3-16*01        | 4*02           | ASILTAQISTFTDVGFLH          | 19 aa  |                    | κ        | 1-9*01   | 2*01           | HQLNSPRYT    | 9 aa        | +                  | +                               | -                                 | 26                | 6        | -      | +     |       |
| 27    | 561_05_09 | 3-30*18        | 6-13*01        | 4*02           | AKDKAPRARKQGFDF             | 15 aa  |                    | κ        | 10-12*01 | 2*01           | QQANSFPFT    | 9 aa        | +                  | +                               | -                                 | 27                | 5        | -      | +     |       |
| 28    | 561_06_69 | 3-30*3*02      | 5-18*01        | 4*02           | ARGGFTYGLFDY                | 13 aa  |                    | κ        | 2-29*03  | 2*01           | LQGVLDPPYT   | 10 aa       | +                  | +                               | -                                 | 28                | 6        | -      | +     |       |
| 30    | 561_05_23 | 4-34*01        | 6-6*01         | 5*02           | AGTKRVANRPKGGWFD            | 17 aa  |                    | κ        | 1-39*01  | 2*01           | QQSYTPYT     | 9 aa        | +                  | +                               | -                                 | 30                | 8        | -      | +     |       |
| 32    | 561_05_10 | 4-34*01        | 3-16*01        | 5*02           | ARLRAKNGYVDWFD              | 15 aa  |                    | λ        | 1-47*01  | 1*01           | AAWDDSFYV    | 10 aa       | +                  | +                               | -                                 | 32                | 7        | -      | +     |       |
| 34    | 561_07_60 | 4-34*01        | 1-7*01         | 4*02           | AGRLAGTRNFNS                | 12 aa  |                    | κ        | 1-5*03   | 3*01           | QQYNSIERLFT  | 11 aa       | +                  | +                               | -                                 | 34                | 2        | -      | +     |       |
| 36    | 561_07_83 | 4-34*01        | 6-6*01         | 4*02           | ARGPKGPRPFGGPDQ             | 16 aa  |                    | κ        | 3-15*01  | 5*01           | QQYYWPSIT    | 10 aa       | +                  | +                               | -                                 | 36                | 3        | -      | +     |       |
| 37    | 561_07_14 | 1-69*01        | 3-16*01        | 6*03           | ARGSDVTVMFEGAGRWEEENFYADV   | 26 aa  |                    | κ        | 4-1*01   | 4*01           | QQYFTIPLT    | 9 aa        | +                  | +                               | -                                 | 37                | 4        | -      | +     |       |
| 40    | 561_07_07 | 3-23*01        | 6-25*01        | 4*02           | ASVLAQAISTFITDVGFLH         | 19 aa  |                    | κ        | 1-9*01   | 2*01           | HQLNSPRYT    | 9 aa        | +                  | +                               | -                                 | 40                | 6        | -      | +     |       |
| 41    | 561_05_78 | 1-69*12        | 3-16*01        | 6*03           | ATDGGAGASITAADNPFYDYSYLYMDV | 32 aa  |                    | κ        | 3-20*01  | 3*01           | QQYSSPVT     | 9 aa        | +                  | +                               | -                                 | 41                | 6        | +      | +     |       |
| 43    | 561_07_10 | 3-7*03         | 3-9*01         | 4*02           | VRYFDSRASEARLDF             | 16 aa  |                    | λ        | 3-10*01  | 1*01           | YSTDKKGLHV   | 11 aa       | +                  | +                               | -                                 | 43                | 2        | +      | +     |       |
| 45    | 561_05_25 | 3-11*01        | 2-21*01        | 3*02           | ARDRRQVLKFTGAGDAFMS         | 19 aa  |                    | λ        | 3-21*02  | 3*02           | QVVDYSRIHCV  | 11 aa       | +                  | +                               | +                                 | 45                | 3        | -      | +     |       |
| 54    | 561_09_01 | 1-69*06        | 6-6*01         | 4*02           | ARSAAPRRFLDASGLNLP          | 20 aa  | 9 aa ins. in CDRH2 | κ        | 3-11*01  | 4*01           | QQSSAWPLT    | 9 aa        | +                  | +                               | -                                 | 54                | 10       | +      | +     |       |

aa, amino acids; ins., insertion; del., deletion; \*, BG505<sub>505P664</sub>; \*\*, YU2<sub>90140</sub> fold-on trimer; \*\*\* Neutralization defined as neutralizing activity detected against at least one viral strain.
