# Supplementary material for: Restriction of HIV-1 Escape by a Highly Broad and Potent Neutralizing Antibody
Source: PubMed Central journal article supplement (PMC7042716; doi:10.1016/j.cell.2020.01.010), 2020-02-06
Supplement: mmc2.pdf [file mmc2.pdf]

**Table S2. Binding of Members of Isolated Antibody Clones Against HIV-1 Env by ELISA, Related to Figure 1**

| Clone | Antibody  | YU2 <sub>gp140</sub>              |                          | BG505 <sub>SOSIP.664</sub>        |                          |
|-------|-----------|-----------------------------------|--------------------------|-----------------------------------|--------------------------|
|       |           | Maximum OD <sub>415-695nm</sub> * | EC <sub>50</sub> (µg/ml) | Maximum OD <sub>415-695nm</sub> * | EC <sub>50</sub> (µg/ml) |
| 1     | 561_01_35 | 0.07                              | N/A                      | 0.10                              | N/A                      |
| 2     | 561_09_03 | 0.06                              | N/A                      | 0.08                              | N/A                      |
| 3     | 561_01_05 | 0.08                              | N/A                      | 0.08                              | N/A                      |
| 4.1   | 561_01_18 | 0.75                              | 0.20                     | 1.46                              | 0.07                     |
| 4.1   | 561_01_21 | 0.51                              | 0.20                     | 1.40                              | 0.09                     |
| 4.1   | 561_01_33 | 0.70                              | 0.15                     | 1.39                              | 0.08                     |
| 4.1   | 561_01_54 | 0.62                              | 0.27                     | 1.40                              | 0.11                     |
| 4.1   | 561_01_55 | 0.75                              | 0.34                     | 1.37                              | 0.08                     |
| 4.1   | 561_02_10 | 0.33                              | 0.63                     | 1.25                              | 0.16                     |
| 4.1   | 561_02_22 | 0.85                              | 0.18                     | 1.40                              | 0.13                     |
| 4.1   | 561_02_27 | 0.72                              | 0.36                     | 1.22                              | 0.07                     |
| 4.1   | 561_02_47 | 0.69                              | 0.52                     | 1.21                              | 0.09                     |
| 4.1   | 561_03_59 | 0.93                              | 0.23                     | 1.58                              | 0.14                     |
| 4.1   | 561_05_18 | 0.66                              | 0.18                     | 1.48                              | 0.12                     |
| 4.1   | 561_08_10 | 0.99                              | 0.18                     | 1.59                              | 0.12                     |
| 4.1   | 561_09_23 | 0.80                              | 0.25                     | 0.56                              | 0.30                     |
| 4.1   | 561_10_07 | 0.79                              | 0.21                     | 0.70                              | 0.21                     |
| 4.2   | 561_08_52 | 1.38                              | 0.10                     | 1.67                              | 0.10                     |
| 4.2   | 561_09_89 | 1.42                              | 0.07                     | 1.20                              | 0.12                     |
| 4.3   | 561_09_71 | 1.55                              | 0.05                     | 1.22                              | 0.13                     |
| 4.4   | 561_01_23 | 1.58                              | 0.06                     | 1.52                              | 0.06                     |
| 4.4   | 561_01_29 | 1.38                              | 0.07                     | 1.54                              | 0.07                     |
| 4.4   | 561_02_12 | 1.47                              | 0.06                     | 1.64                              | 0.06                     |
| 4.4   | 561_02_21 | 1.48                              | 0.07                     | 1.58                              | 0.07                     |
| 4.4   | 561_03_07 | 1.49                              | 0.07                     | 1.65                              | 0.08                     |
| 4.4   | 561_03_78 | 1.43                              | 0.06                     | 1.73                              | 0.08                     |
| 6     | 561_01_30 | 0.07                              | N/A                      | 0.08                              | N/A                      |
| 7     | 561_01_50 | 1.63                              | 0.31                     | 1.68                              | 0.08                     |
| 8     | 561_01_02 | 1.58                              | 2.20                     | 1.56                              | 0.13                     |
| 8     | 561_02_17 | 1.51                              | 0.99                     | 1.37                              | 0.04                     |
| 9     | 561_02_32 | 0.04                              | N/A                      | 0.07                              | N/A                      |
| 10    | 561_08_24 | 1.52                              | 0.91                     | 1.33                              | 0.77                     |
| 11    | 561_02_73 | 1.44                              | 0.10                     | 1.57                              | 0.21                     |
| 13    | 561_05_16 | 1.75                              | 0.06                     | 1.68                              | 0.08                     |
| 14    | 561_05_75 | 1.54                              | 0.05                     | 0.07                              | N/A                      |
| 17    | 561_05_54 | 1.50                              | 0.04                     | 1.18                              | 3.93                     |
| 18    | 561_05_11 | 1.47                              | 0.05                     | 0.68                              | 9.43                     |
| 20    | 561_02_33 | 1.42                              | 0.04                     | 1.10                              | 5.13                     |
| 21    | 561_05_02 | 0.04                              | N/A                      | 0.03                              | N/A                      |
| 22    | 561_05_44 | 1.22                              | 0.15                     | 1.49                              | 0.89                     |
| 23    | 561_06_44 | 0.99                              | 0.47                     | 1.30                              | 1.76                     |
| 24    | 561_05_83 | 0.95                              | 21.4                     | 0.91                              | 9.50                     |
| 25    | 561_06_09 | 1.19                              | 0.43                     | 1.53                              | 0.94                     |
| 26    | 561_05_65 | 1.52                              | 0.04                     | 1.46                              | 5.36                     |
| 27    | 561_05_09 | 1.01                              | 0.25                     | 0.04                              | N/A                      |
| 28    | 561_06_69 | 1.23                              | 0.06                     | 0.56                              | N/A                      |
| 30    | 561_05_23 | 0.06                              | 2.53                     | 0.10                              | 4.44                     |
| 32    | 561_05_10 | 1.60                              | 0.15                     | 1.37                              | 0.04                     |
| 34    | 561_07_60 | 0.92                              | 1.35                     | 0.35                              | 0.13                     |
| 36    | 561_07_83 | 1.37                              | 0.15                     | 0.08                              | 4.41                     |
| 37    | 561_07_14 | 1.12                              | 0.38                     | 1.35                              | 0.83                     |
| 40    | 561_07_07 | 1.31                              | 0.12                     | 1.16                              | 4.03                     |
| 41    | 561_05_78 | 1.56                              | 0.06                     | 1.66                              | 0.09                     |
| 43    | 561_07_10 | 1.54                              | 0.22                     | 1.73                              | 0.13                     |
| 45    | 561_05_25 | 1.59                              | 0.10                     | 1.58                              | 0.10                     |
| 54    | 561_09_01 | 1.04                              | 0.89                     | 0.41                              | 0.73                     |

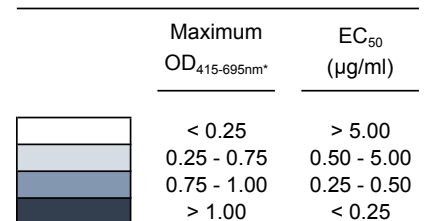

\* Antibodies were tested up to 10 µg/ml. 3BNC117 was included as reference on each ELISA plate and ODs were determined when the OD<sub>415-695nm</sub> for 3BNC117 was at a median of 1.53 for YU2<sub>gp140</sub> (range 1.32-1.73) and 1.49 for BG505<sub>SOSIP.664</sub> (range 1.22-1.70). OD, optical density; EC<sub>50</sub>, half-maximal effective concentration.
