# Supplementary material for: Restriction of HIV-1 Escape by a Highly Broad and Potent Neutralizing Antibody
Source: PubMed Central journal article supplement (PMC7042716; doi:10.1016/j.cell.2020.01.010), 2020-02-06
Supplement: mmc3.pdf [file mmc3.pdf]

**Table S3. Neutralizing Activity Against Global Pseudovirus Panel, Related to Figures 1 and 2**

**A**

**Antibodies identified from IDC561**

| Clone | Antibody  | IC <sub>50</sub> (µg/ml) |       |       |       |       |       |       |          |       |        |        |       | GeoMean* |
|-------|-----------|--------------------------|-------|-------|-------|-------|-------|-------|----------|-------|--------|--------|-------|----------|
|       |           | 398F1                    | CNE8  | CNE55 | 246F3 | X2278 | Tro11 | CH119 | BJOX2000 | 25710 | CE1176 | CE0217 | X1632 |          |
| 1     | 561_01_35 | >25                      | >25   | >25   | >25   | >25   | >25   | >25   | >25      | >25   | >25    | >25    | >25   | n/a      |
| 2     | 561_09_03 | >25                      | >25   | >25   | >25   | >25   | >25   | >25   | >25      | >25   | >25    | >25    | >25   | n/a      |
| 3     | 561_01_05 | >25                      | >25   | >25   | >25   | >25   | >25   | >25   | >25      | >25   | >25    | >25    | >25   | n/a      |
| 4.1   | 561_01_18 | 0.07                     | 0.02  | 0.02  | 0.03  | 0.02  | 0.02  | 0.05  | 0.04     | 0.03  | 0.23   | 0.04   | 0.03  | 0.035    |
| 4.1   | 561_01_21 | 0.33                     | 0.05  | 0.02  | 0.04  | 0.03  | 0.03  | 0.90  | 0.05     | 0.05  | 0.54   | 0.11   | 0.07  | 0.086    |
| 4.1   | 561_01_33 | 0.21                     | 0.04  | 0.03  | 0.06  | 0.03  | 0.03  | 0.17  | 0.04     | 0.06  | 0.64   | 0.11   | 0.04  | 0.071    |
| 4.1   | 561_01_54 | 4.48                     | 0.08  | 0.07  | 0.09  | 0.07  | 0.06  | 0.59  | 0.13     | 0.08  | 1.86   | 0.25   | 0.14  | 0.198    |
| 4.1   | 561_01_55 | 0.27                     | 0.04  | 0.05  | 0.07  | 0.03  | 0.04  | 0.14  | 0.06     | 0.05  | 0.50   | 0.07   | 0.07  | 0.075    |
| 4.1   | 561_02_10 | 2.36                     | 0.06  | 0.08  | 0.12  | 0.03  | 0.04  | 0.33  | 0.10     | 0.11  | 2.95   | 0.27   | 0.17  | 0.172    |
| 4.1   | 561_02_22 | 0.09                     | <0.01 | 0.03  | 0.01  | 0.02  | 0.02  | 0.06  | 0.02     | 0.04  | 0.38   | 0.03   | 0.03  | 0.032    |
| 4.1   | 561_02_27 | 0.22                     | 0.02  | 0.05  | 0.03  | 0.02  | 0.04  | 0.20  | 0.05     | 0.06  | 0.92   | 0.07   | 0.03  | 0.063    |
| 4.1   | 561_02_47 | 0.46                     | 0.02  | 0.04  | 0.03  | 0.02  | 0.03  | 0.15  | 0.04     | 0.05  | 0.98   | 0.08   | 0.05  | 0.065    |
| 4.1   | 561_03_59 | 0.27                     | 0.05  | 0.04  | 0.06  | 0.03  | 0.05  | 0.18  | 0.12     | 0.07  | 0.99   | 0.07   | 0.08  | 0.090    |
| 4.1   | 561_05_18 | 0.29                     | 0.03  | 0.04  | 0.04  | 0.02  | 0.05  | 0.22  | 0.05     | 0.06  | 0.87   | 0.06   | 0.05  | 0.073    |
| 4.1   | 561_08_10 | 0.15                     | 0.10  | 0.05  | 0.07  | 0.03  | 0.04  | 0.14  | 0.08     | 0.07  | 0.40   | 0.11   | 0.05  | 0.082    |
| 4.1   | 561_09_23 | 3.97                     | 0.05  | 0.03  | 0.07  | 0.03  | 0.03  | 0.23  | 0.09     | 0.06  | 0.39   | 0.10   | 2.51  | 0.135    |
| 4.1   | 561_10_07 | 0.20                     | 0.04  | 0.04  | 0.08  | 0.03  | 0.04  | 0.17  | 0.05     | 0.06  | 0.30   | 0.12   | 0.05  | 0.071    |
| 4.2   | 561_08_52 | 0.29                     | 0.04  | 0.04  | 0.10  | 0.03  | 0.05  | 0.05  | 0.04     | 0.13  | 0.45   | 0.05   | >25   | 0.074    |
| 4.2   | 561_09_89 | 0.35                     | <0.01 | 0.02  | 0.04  | 0.02  | 0.01  | 0.04  | <0.01    | 0.04  | 0.27   | <0.01  | >25   | 0.033    |
| 4.3   | 561_09_71 | 12.95                    | 2.95  | <0.01 | 2.63  | 0.02  | 0.01  | <0.01 | 0.02     | 0.02  | 0.07   | <0.01  | >25   | 0.084    |
| 4.4   | 561_01_23 | 0.87                     | 0.04  | 0.02  | 0.07  | <0.01 | 0.02  | <0.01 | 0.01     | 0.03  | 0.09   | 0.01   | >25   | 0.034    |
| 4.4   | 561_01_29 | 10.14                    | 0.51  | 0.04  | 0.77  | 0.03  | 0.02  | 0.04  | 0.03     | 0.06  | 0.30   | 0.01   | >25   | 0.110    |
| 4.4   | 561_02_12 | 3.22                     | 0.08  | 0.03  | 0.22  | 0.03  | 0.04  | 0.05  | 0.03     | 0.08  | 0.36   | 0.04   | >25   | 0.090    |
| 4.4   | 561_02_21 | 7.27                     | 0.11  | 0.03  | 0.45  | 0.03  | 0.04  | 0.08  | 0.02     | 0.18  | 0.34   | 0.04   | >25   | 0.115    |
| 4.4   | 561_03_07 | 9.10                     | 0.14  | 0.04  | 0.31  | 0.04  | 0.04  | 0.10  | 0.03     | 0.08  | 0.46   | <0.01  | >25   | 0.111    |
| 4.4   | 561_03_78 | 4.32                     | 0.13  | 0.04  | 0.22  | 0.02  | 0.03  | 0.05  | 0.02     | 0.04  | 0.29   | 0.02   | >25   | 0.075    |
| 6     | 561_01_30 | >25                      | >25   | >25   | >25   | >25   | >25   | >25   | >25      | >25   | >25    | >25    | >25   | n/a      |
| 7     | 561_01_50 | >25                      | >25   | >25   | >25   | >25   | 3.24  | >25   | >25      | >25   | >25    | >25    | >25   | 3.24     |
| 8     | 561_01_02 | >25                      | >25   | >25   | >25   | >25   | >25   | >25   | >25      | >25   | >25    | >25    | >25   | n/a      |
| 8**   | 561_02_17 | >5                       | >5    | >5    | >5    | >5    | >5    | >5    | >5       | >5    | 2.17   | >5     | >5    | 2.17     |
| 9     | 561_02_32 | >25                      | >25   | >25   | >25   | >25   | >25   | >25   | >25      | >25   | >25    | >25    | >25   | n/a      |
| 10    | 561_08_24 | >25                      | >25   | >25   | >25   | >25   | 0.35  | >25   | >25      | >25   | >25    | >25    | >25   | 0.350    |
| 11    | 561_02_73 | >10                      | >10   | >10   | >10   | >10   | >10   | >10   | >10      | >10   | >10    | >10    | >10   | n/a      |
| 13    | 561_05_16 | >25                      | 3.10  | >25   | >25   | >25   | >25   | >25   | >25      | 23.40 | >25    | >25    | >25   | 8.52     |
| 14    | 561_05_75 | >25                      | >25   | >25   | >25   | >25   | >25   | >25   | >25      | >25   | >25    | >25    | >25   | n/a      |
| 17    | 561_05_54 | >10                      | >10   | >10   | >10   | >10   | >10   | >10   | >10      | >10   | >10    | >10    | >10   | n/a      |
| 18    | 561_05_11 | >25                      | >25   | >25   | >25   | >25   | >25   | >25   | >25      | >25   | >25    | >25    | >25   | n/a      |
| 20    | 561_02_33 | >25                      | >25   | >25   | >25   | >25   | >25   | >25   | >25      | >25   | >25    | >25    | >25   | n/a      |
| 21    | 561_05_02 | >25                      | >25   | >25   | >25   | >25   | >25   | >25   | >25      | >25   | >25    | >25    | >25   | n/a      |
| 22    | 561_05_44 | >25                      | >25   | >25   | >25   | >25   | >25   | >25   | >25      | 8.29  | >25    | >25    | >25   | 8.29     |
| 23    | 561_06_44 | >25                      | >25   | >25   | >25   | >25   | >25   | >25   | >25      | 10.83 | >25    | >25    | >25   | 10.83    |
| 24    | 561_05_83 | >25                      | >25   | >25   | >25   | >25   | >25   | >25   | >25      | >25   | >25    | >25    | >25   | n/a      |
| 25    | 561_06_09 | >10                      | >10   | >10   | >10   | >10   | >10   | >10   | >10      | >10   | >10    | >10    | >10   | n/a      |
| 26    | 561_05_65 | >25                      | >25   | >25   | >25   | >25   | >25   | >25   | >25      | >25   | >25    | >25    | >25   | n/a      |
| 27    | 561_05_09 | >25                      | >25   | >25   | >25   | >25   | >25   | >25   | >25      | >25   | >25    | >25    | >25   | n/a      |
| 28    | 561_06_69 | >25                      | >25   | >25   | >25   | >25   | >25   | >25   | >25      | >25   | >25    | >25    | >25   | n/a      |
| 30    | 561_05_23 | >25                      | >25   | >25   | >25   | >25   | >25   | >25   | >25      | >25   | >25    | >25    | >25   | n/a      |
| 32    | 561_05_10 | >25                      | >25   | >25   | >25   | >25   | >25   | >25   | >25      | >25   | >25    | >25    | >25   | n/a      |
| 34    | 561_07_60 | >25                      | >25   | >25   | >25   | >25   | >25   | >25   | >25      | >25   | >25    | >25    | >25   | n/a      |
| 36    | 561_07_83 | >25                      | >25   | >25   | >25   | >25   | >25   | >25   | >25      | >25   | >25    | >25    | >25   | n/a      |
| 37    | 561_07_14 | >17.5                    | >17.5 | >17.5 | >17.5 | >17.5 | >17.5 | >17.5 | >17.5    | >17.5 | >17.5  | >17.5  | >17.5 | n/a      |
| 40    | 561_07_07 | >25                      | >25   | >25   | >25   | >25   | >25   | >25   | >25      | >25   | >25    | >25    | >25   | n/a      |
| 41    | 561_05_78 | >25                      | >25   | >25   | >25   | >25   | >25   | >25   | >25      | 13.54 | >25    | >25    | >25   | 13.54    |
| 43    | 561_07_10 | >25                      | >25   | >25   | >25   | >25   | >25   | >25   | >25      | >25   | >25    | >25    | >25   | n/a      |
| 45    | 561_05_25 | >25                      | 6.78  | >25   | >25   | >25   | >25   | >25   | >25      | 6.11  | >25    | >25    | >25   | 6.44     |
| 54    | 561_09_01 | >25                      | >25   | >25   | >25   | >25   | >25   | >25   | >25      | >25   | >25    | >25    | >25   | n/a      |

\* Geometric mean IC<sub>50</sub> of neutralized viruses.

\*\* Antibody tested at a maximum concentration of 5 µg/ml.

|                          |
|--------------------------|
| IC <sub>50</sub> (µg/ml) |
| <0.1                     |
| 0.1-0.5                  |
| 0.5-1                    |
| 1-2                      |
| 2-5                      |
| 5-10                     |
| >10                      |

**B**

**1-18 vs. 1-18Δins**

| Antibody         | IC <sub>50</sub> (µg/ml) |      |       |       |       |       |       |          |       |        |        |       | GeoMean* |       |
|------------------|--------------------------|------|-------|-------|-------|-------|-------|----------|-------|--------|--------|-------|----------|-------|
|                  | 398F1                    | CNE8 | CNE55 | 246F3 | X2278 | Tro11 | CH119 | BJOX2000 | 25710 | CE1176 | CE0217 | X1632 |          |       |
| 561_01_18        | 0.07                     | 0.02 | 0.02  | 0.03  | 0.02  | 0.02  | 0.05  | 0.04     | 0.03  | 0.23   | 0.04   | 0.03  | 0.03     | 0.035 |
| 561_01_18_Δins** | 0.97                     | 0.04 | 0.11  | 0.13  | 0.03  | 0.03  | 0.03  | <0.01    | 0.10  | 1.64   | 0.85   | 0.30  | 0.30     | 0.114 |

\* Geometric mean IC<sub>50</sub> of neutralized viruses.

\*\* Engineered 1-18 variant in which the 6 amino acid CDRH1 insertion was removed  
 CDRH1 561\_01\_18: DDPTDDDFPTKYY  
 CDRH1 561\_01\_18\_Δins: DD-----PTKYY

|                          |
|--------------------------|
| IC <sub>50</sub> (µg/ml) |
| <0.1                     |
| 0.1-0.5                  |
| 0.5-1                    |
| 1-2                      |
