# Supplementary material for: Restriction of HIV-1 Escape by a Highly Broad and Potent Neutralizing Antibody
Source: PubMed Central journal article supplement (PMC7042716; doi:10.1016/j.cell.2020.01.010), 2020-02-06
Supplement: mmc4.pdf [file mmc4.pdf]

**Table S4. Sequences of  $V_H1-46$ -Derived bNABs from Individual IDC561, Related to Figures 1 and 2**

**A**

| Clone | Antibody           | FWR1                                                                                                                             | CDR1                        | FWR2                     | CDR2                      | FWR3  | CDR3 | FWR4 |
|-------|--------------------|----------------------------------------------------------------------------------------------------------------------------------|-----------------------------|--------------------------|---------------------------|-------|------|------|
|       | <b>IGHV1-46*01</b> | QVQLVQSGAEVKKPGASVKVSCKASGY                                                                                                      | -----TFTSYMHVWRQAPGQGLEWMGI | INPSSGGTSTYAKQKQGRVMTDRD | TSTSTVVMELSSLRSEDTAVYYCAR | ----- |      |      |
| 4.1   | 561_01_18          | .GR.F.....R.....RI.R.DDDPYTDDD..K.WT..I.....RP.L.V.S.HFARPI.SY..RD.L.L..S.LTA..L..KG.QPD.SGI.F...DPFGDRAP---HNYHMDVWGGGTAVIVSS   |                             |                          |                           |       |      |      |
| 4.1   | 561_01_55          | .RR.F...T...R.....I..R.DDDPYTDDD..K.T..I.....PP.L.V.S.HFARPI.SY..RD.L.L..S.LTA..F..RG.QPD..GI.F...DPFGDMYP---HNYHMDVWGGGTAVIVSA  |                             |                          |                           |       |      |      |
| 4.1   | 561_01_21          | .RR.F...T...R.....I..R.DDDPYTDDD..K.T..I.....RP.L.V.S.HFARPI.SY...D.L.L..S.LTA..F..RG.QPD..GI.F...DPFGDMYP---HNYHMDVWGGGTAVIVSA  |                             |                          |                           |       |      |      |
| 4.1   | 561_01_33          | .GR.F...T...R.....I..R.DDDPYTDDD..K.T..I.....RP.L.V.S.HFARPI.SY..RD.L.L..S.LTA..F..RG.QPD..GI.F...DPFGDMYP---HNYHMDVWGGGTAVIVSA  |                             |                          |                           |       |      |      |
| 4.1   | 561_01_54          | .GR.F...T...R.....I..R.DDDPYTDDD..K.T..I.....RP.L.V.S.HFARPI.SY...D.L.L..S.LTA..F..RG.QPD..GI.F...DPFGDMYP---HNSHMDVWGGGTAVIVSA  |                             |                          |                           |       |      |      |
| 4.1   | 561_02_10          | .GR.F...T...R.....I..R.DDDPYTDDD..K.HT..I.....RP.L.V.S.HYARPI.SY..D.L.L..S.LTA..F..RG.QPD..GI.F...DPFGNMP---HNYHMDVWGGGTAVIVSA   |                             |                          |                           |       |      |      |
| 4.1   | 561_02_22          | .GR.F...T...R.....I..R.DDDPYTDDD..K.T..I.....RP.L.V.S.HFARPI.SY..RD.L.L..S.LTA..F..RG.QPD..GI.F...DPFGDMYP---HNYHMDVWGGGTAVIVSA  |                             |                          |                           |       |      |      |
| 4.1   | 561_02_27          | .GR.F...T...R.....I..R.DDDPYTDDD..K.T..I.....RP.L.V.S.HYARPI.SY..RD.L.L..S.LTA..F..RG.QPD..GI.F...DPFGDMYP---HNYHMDVWGGGTAVIVSA  |                             |                          |                           |       |      |      |
| 4.1   | 561_02_47          | .RR.F...T...R.....I..R.DDDPYTDDD..K.T..I.....RP.L.V.S.HYARPI.SY...D.L.L..S.LTA..F..RG.QPD..GI.F...DPFGDMYP---HNYHMDVWGGGTAVIVSA  |                             |                          |                           |       |      |      |
| 4.1   | 561_03_59          | .RR.F...T...R.....RI.R.DDDPYTDDD..K.WT..I.....RP.L.V.S.HFARPI.SY...D.L.L..S.LTG..L..KG.QLD.SGI.F...DPFGDRAP---HNYHMDVWGGGTAVIVSS |                             |                          |                           |       |      |      |
| 4.1   | 561_05_18          | .RR.F...T...R.....I..R.DDDPYTDDD..K.T..I.....RP.L.V.S.HFARPI.SY...D.L.L..S.LTA..F..RG.QPD..GI.F...DPFGDMYP---HNYHMDVWGGGTAVIVSA  |                             |                          |                           |       |      |      |
| 4.1   | 561_08_10          | .GR.F...T...R.....RI.R.DDDPYTDDD..K.WT..I.....RP.L.V.S.HFARPI.SY..RD.L.L..S.LTA..L..KG.QPD.SGI.F...DPFGDRAP---HNYHMDVWGGGTAVIVSS |                             |                          |                           |       |      |      |
| 4.1   | 561_09_23          | .AH.F...L..R.....RI.R.DDDPYTDDD..K.T..I.....RP.L.V.S.HFARPI.SY...D.L.L..S.LTA..L..R...LD..GI...DPFGERAP---HNYHMDVWGGGTAVIVSS     |                             |                          |                           |       |      |      |
| 4.1   | 561_10_07          | .GRFF.....R.....RI.R.DDDPYTDDD..K.WT..I.....RP.L.V.S.HFARPI.SY..RD.L.L..S.LTA..L..QG.QPD.SGI...DPFGDRAP---HNYHMDVWGGGTAVIVSS     |                             |                          |                           |       |      |      |
| 4.2   | 561_08_52          | ---.W.GG..R.....RI..QCPED-----K..I.....R...L.MVS.H..RPFHTSE.RD.L.....IHET.HH.V..G.GVA.SGT.F...DPLGEKSPA---YSHHMDVWGGGTAVIVSS     |                             |                          |                           |       |      |      |
| 4.2   | 561_09_89          | ---.W.GG..R.....RI..QCPED-----K..I.....R...L.MVS.H..RPFHTSE.RD.L.....EIHET.HH.V..G.GVG.SGT.F...DPLGEKSPA---YSHHMDVWGGGTAVIVSS    |                             |                          |                           |       |      |      |
| 4.3   | 561_09_71          | ---.A..GG.....I..VTPES-----K.WL.....F..L.VVS.H..RPMF.N..RD.L.L..S.LTA..I.H.T.H...RG.T.D..I.....DSFGETFRHSGDQPYQMDVWGGGTAVIVSS    |                             |                          |                           |       |      |      |
| 4.4   | 561_01_23          | ---.GG.RR.....I..ETPE-----K.WL..L.....R.....VVS.H..RPMF.FE.RD.L.L..S.LTA..I.H.T.H...RG.T.D...F...DSFGETFRG-HDQPYQMDVWGGGTAVIVSS  |                             |                          |                           |       |      |      |
| 4.4   | 561_01_29          | ---.GG.RR.....I..ETPE-----K.WL..L.....R.....VVS.H..RPMF.FE.RD.L.L..S.LTA..I.H.T.H...RG.T.D...F...DSFGETFRG-HDQPYQMDVWGGGTAVIVSS  |                             |                          |                           |       |      |      |
| 4.4   | 561_02_12          | ---.GG.RR.....I..ETPED-----K.WL..L.....R.....VVS.H..RPMF.FE.RD.L.L..S.LTA..I.H.T.HF...RG.T.D...DPFGETFRG-HDQPYQMDVWGGGTAVIVSS    |                             |                          |                           |       |      |      |
| 4.4   | 561_02_21          | ---.GG.RR.....I..ETPE-----K.WL..L.....R.....VVS.H..RPMF.FE.RD.L.L..S.LTA..I.H.T.H...GG.TLD...DPFGETFRG-HDQPYQMDVWGGGTAVIVSS      |                             |                          |                           |       |      |      |
| 4.4   | 561_03_07          | ---.GG.RR.....I..ETPED-----K.WL..L.....R.....VVS.H..RPMF.FE.RD.L.L..S.LTA..I.H.T.HF...RG.T.D...DPFGETFRG-HDQPYQMDVWGGGTAVIVSS    |                             |                          |                           |       |      |      |
| 4.4   | 561_03_78          | ---.GG.RR.....I..ETPE-----K.WL..L.....R.....VVS.H..RPMF.FE.RD.L.L..S.LTA..I.H.T.H...GG.T.D...DPFGETFRG-HDQPYQMDVWGGGTAVIVSS      |                             |                          |                           |       |      |      |

**B**

| Clone | Antibody           | FWR1                                                                                                   | CDR1 | FWR2 | CDR2 | FWR3 | CDR3 | FWR4 |
|-------|--------------------|--------------------------------------------------------------------------------------------------------|------|------|------|------|------|------|
|       | <b>IGKV3-20*01</b> | EIVLTQSPGTLSPGERATLSCRASQVSSSYLAWYQKPKQAPRLLIYGASSRATGIPDRF--SGSGSGTDFTLTISRLEPEDFAVYYCQYQYGS-SF-----  |      |      |      |      |      |      |
| 4.1   | 561_01_18          | .V.....AI..V...D.VI.....GLD..H...RF.R..I.T.V.F.T.N..R.T.....A.....V.....T.....R..G-T.ITFGGGTTLDDKK     |      |      |      |      |      |      |
| 4.1   | 561_01_55          | .A.....AI..V...D.VI...K.EGL...D...RF.G..I.T.V.F...N..R.T.....N.V.....T.....R..G-T.ITFGGGTTLDDKK        |      |      |      |      |      |      |
| 4.1   | 561_01_21          | .V.....AI..V...D.VI...K.EGL...D...RF.G..I.T.V.F.T.T..R.T.....V.....T.....R..G-T.ITFGGGTTLDDKK          |      |      |      |      |      |      |
| 4.1   | 561_01_33          | .V.....AI..V...D.VI...K.EGL...D...RF.G..I.T.V.F.T.N..R.T.....N.VQ.....T.....R..G-T.ITFGGGTTLDDKK       |      |      |      |      |      |      |
| 4.1   | 561_01_54          | .V.....AI..V...D.VI...K.EGL...D...RF.S..I.T.V.F...N..R.T.....N.V.....T.....R..G-T.ITFGGGTTLDDKK        |      |      |      |      |      |      |
| 4.1   | 561_02_10          | .V.....AI..V...D.VI...K.EGL...D...RF.R..I.T.V.F...T..R.T.....N.V.....T.....R..G-T.ITFGGGTTLDDKK        |      |      |      |      |      |      |
| 4.1   | 561_02_22          | .V.....AI..V...D.VI...K.EGL...D...RF.G..I.T.V.FAT.N..R.T.....KVQ.....T.....R..G-T.ITFGGGTTLDDKK        |      |      |      |      |      |      |
| 4.1   | 561_02_27          | .V.....AI..V...D.VI...K.EGL...D...RF.G..I.T.V.F...N..R.T.....N.V.....T.....R..G-T.ITFGGGTTLDDKK        |      |      |      |      |      |      |
| 4.1   | 561_02_47          | .V.....AI..V...D.VI...K.EGL...D...RF.S..I.T.V.F...N..R.T.....A.....N.V.....T.....R..G-T.ITFGGGTTLDDKK  |      |      |      |      |      |      |
| 4.1   | 561_03_59          | .V.....AI..V...D.VSF...EGLD.T.Q...RF.R..I.T.V.FAT.N..R.T.....A.....N.V.....T.....R..A-T.ITFGGGTTLDDKK  |      |      |      |      |      |      |
| 4.1   | 561_05_18          | .V.....AI..V...D.VI...K.EGL...D...RF.G..I.T.V.F.T.T..R.T.....V.....T.....R..G-T.ITFGGGTTLDDKK          |      |      |      |      |      |      |
| 4.1   | 561_08_10          | .V.....AI..V...D.VI...GLD..H...RF.R..I.T.V.F.T.N..R.T.....A.....V.....T.....R..G-T.ITFGGGTTLDDKK       |      |      |      |      |      |      |
| 4.1   | 561_09_23          | .V.....AI..A...D.VV...EGLD..Q...RF.D..I..VLF.V.N..R.T.....G..A.....V.R.....T...RF.A-T.ITFGGGTTLDDKN    |      |      |      |      |      |      |
| 4.1   | 561_10_07          | .V.....AI..V...D.VI...EGLD.PTH...RF.R..I.T.V.F.T.N..R.T.....EA.....T.V.....T.....R..G-T.ITFGGGTTLDDKK  |      |      |      |      |      |      |
| 4.2   | 561_08_52          | AV.....V...V...T.I.....HGLDTRHVT.F...R.....FATYR..S.VS...RATD..A..N...TAV..A..T.F..T..AIT.ITFGGGTRVLDK |      |      |      |      |      |      |
| 4.2   | 561_09_89          | AV.....V...V...S.V...HGLDTRHVT.F...R.....FAT.R..S.VS...RATDG..A..N...TAV..A..T...T..AIT.ITFGGGTKLDK    |      |      |      |      |      |      |
| 4.3   | 561_09_71          | .P.....GF.VDH..F.KR..RP...FET.R..N.S...A.AEY...NV.....S...IT.LIFGGTRVDDK                               |      |      |      |      |      |      |
| 4.4   | 561_01_23          | .P.....G.....R.GF.ADHV..F.K..RP...FE.R..S.T.E...G..PEY...T.V.....S...IT.LVFGGGTRVDDK                   |      |      |      |      |      |      |
| 4.4   | 561_01_29          | .P.....GV.....R.GF.ADHV..F.K..RP...FET.R..S.T.E...G..PEY...T.V.....S...IT.LVFGGGTRVDDK                 |      |      |      |      |      |      |
| 4.4   | 561_02_12          | .P.....V.....G.....R.GF.ADHV..F.K..RP...FE.R..S.T.E...PEY...T.V.A.....S...IT.LVFGGGTRVDDK              |      |      |      |      |      |      |
| 4.4   | 561_02_21          | .AL.....G.....R.GF.ADHV..F.K..RP...FE.R..S.T.E...PEY...T.V.....S...IT.LVFGGGTRVDDK                     |      |      |      |      |      |      |
| 4.4   | 561_03_07          | .P.....V.....G.....R.GF.ADHV..F.K..RP...FE.R..S.T.E...PEY...T.V.....S...IT.LVFGGGTRVDDK                |      |      |      |      |      |      |
| 4.4   | 561_03_78          | .P.....G.....R.GF.ADHV..F.K..RP...FE.R..S.T.E...PEY...T.V.....S...IT.LVFGGGTRVDDK                      |      |      |      |      |      |      |
