# Supplementary material for: Restriction of HIV-1 Escape by a Highly Broad and Potent Neutralizing Antibody
Source: PubMed Central journal article supplement (PMC7042716; doi:10.1016/j.cell.2020.01.010), 2020-02-06
Supplement: mmc5.pdf [file mmc5.pdf]

**Table S5. Neutralizing Activity Against Multiclade, Clade C, and Primary Virus Panels, Related to Figure 2 (continued)**

119 Pseudovirus Multiclade Panel (continued)

| Virus                              | Clade | 561_01_18        |                  | 561_01_55        |                  | 561_02_12        |                  | N6               |                  | 3BNC117          |                  | VRC01            |                  | 10-1074          |                  | PGT121           |                  |
|------------------------------------|-------|------------------|------------------|------------------|------------------|------------------|------------------|------------------|------------------|------------------|------------------|------------------|------------------|------------------|------------------|------------------|------------------|
|                                    |       | IC <sub>50</sub> | IC <sub>80</sub> | IC <sub>50</sub> | IC <sub>80</sub> | IC <sub>50</sub> | IC <sub>80</sub> | IC <sub>50</sub> | IC <sub>80</sub> | IC <sub>50</sub> | IC <sub>80</sub> | IC <sub>50</sub> | IC <sub>80</sub> | IC <sub>50</sub> | IC <sub>80</sub> | IC <sub>50</sub> | IC <sub>80</sub> |
| 620345.c01                         | AE    | 0.145            | 1.964            | 0.222            | 2.687            | >20              | >20              | 4.393            | >20              | >20              | >20              | >20              | >20              | >20              | >20              | >20              | >20              |
| CNE8                               | AE    | 0.005            | 0.030            | 0.026            | 0.097            | 0.022            | 0.206            | 0.112            | 0.483            | 0.086            | 0.361            | 0.678            | 1.672            | >20              | >20              | >20              | >20              |
| C1080.c03                          | AE    | 0.020            | 0.100            | 0.069            | 0.492            | 0.010            | 0.112            | 0.383            | 1.560            | 0.120            | 0.790            | 1.613            | 9.664            | >20              | >20              | >20              | >20              |
| R2184.c04                          | AE    | 0.004            | 0.020            | 0.011            | 0.038            | 0.005            | 0.027            | 0.021            | 0.104            | 0.032            | 0.110            | 0.081            | 0.313            | >20              | >20              | >20              | >20              |
| R1166.c01                          | AE    | 0.006            | 0.026            | 0.015            | 0.065            | 0.006            | 0.037            | 0.200            | 0.959            | 0.203            | 0.622            | 1.642            | 5.640            | >20              | >20              | >20              | >20              |
| R3285.c06                          | AE    | 0.010            | 0.086            | 0.030            | 0.266            | 0.005            | 0.034            | 0.040            | 0.323            | 0.060            | 1.952            | 0.347            | 2.266            | >20              | >20              | >20              | >20              |
| C2101.c01                          | AE    | 0.038            | 0.330            | 0.077            | 0.450            | 0.003            | 0.036            | 0.073            | 0.486            | 0.060            | 0.188            | 0.189            | 0.709            | >20              | >20              | >20              | >20              |
| C3347.c11                          | AE    | 0.027            | 0.090            | 0.018            | 0.080            | 0.016            | 0.060            | 0.012            | 0.054            | 0.031            | 0.105            | 0.077            | 0.325            | >20              | >20              | >20              | >20              |
| C4118.c09                          | AE    | 0.040            | 0.249            | 0.161            | 1.108            | 0.020            | 0.086            | 0.089            | 0.392            | 0.030            | 0.187            | 0.111            | 0.606            | >20              | >20              | >20              | >20              |
| CNE5                               | AE    | 0.184            | 0.868            | 2.789            | 15.607           | 0.137            | 0.838            | 0.139            | 0.618            | 0.344            | 1.068            | 0.332            | 0.996            | >20              | >20              | >20              | >20              |
| BJOX009000.02.4                    | AE    | 0.386            | 1.300            | 19.308           | >20              | 0.124            | 0.807            | 0.353            | 1.347            | 0.365            | 1.277            | 2.412            | 5.667            | >20              | >20              | 4.156            | >20              |
| BJOX015000.11.5                    | AE    | 0.117            | 0.773            | 0.097            | 1.148            | 0.033            | 0.308            | 0.067            | 0.524            | 0.053            | 0.303            | 0.293            | 1.058            | >20              | >20              | >20              | >20              |
| BJOX010000.06.2                    | AE    | 0.526            | 3.408            | 3.403            | 14.691           | 0.228            | 1.538            | 0.587            | 2.595            | 1.772            | 6.245            | 9.188            | 17.773           | >20              | >20              | >20              | >20              |
| BJOX025000.01.1                    | AE    | 0.120            | 0.839            | 0.054            | 0.584            | 0.024            | 0.238            | 0.020            | 0.102            | 0.063            | 0.262            | 4.126            | >20              | >20              | >20              | >20              |                  |
| BJOX028000.10.3                    | AE    | 0.806            | >20              | >20              | >20              | 0.027            | 1.812            | 0.003            | 0.013            | 0.012            | 0.048            | 0.532            | 1.149            | >20              | >20              | >20              | >20              |
| T257-31                            | AG    | 0.050            | 0.199            | 0.105            | 0.475            | 0.183            | 1.345            | 0.171            | 0.855            | 0.133            | 0.507            | 2.145            | 6.753            | >20              | >20              | >20              | >20              |
| 928-28                             | AG    | 0.189            | 0.672            | 0.633            | 2.918            | 0.133            | 0.643            | 0.097            | 0.461            | 0.156            | 0.533            | 0.436            | 1.265            | 0.759            | 2.915            | >20              | >20              |
| 263-B                              | AG    | 0.016            | 0.058            | 0.038            | 0.104            | 0.019            | 0.096            | 0.047            | 0.213            | 0.030            | 0.090            | 0.200            | 0.588            | 0.262            | 4.362            | 1.008            | 7.901            |
| T250-4                             | AG    | 0.019            | 0.067            | 0.037            | 0.144            | >20              | >20              | 0.016            | 0.055            | >20              | >20              | >20              | >20              | 0.001            | 0.005            | 0.001            | 0.011            |
| T251-18                            | AG    | 0.044            | 0.137            | 0.070            | 0.235            | 0.044            | 0.218            | 0.365            | 1.905            | 0.210            | 0.744            | 3.419            | 10.447           | 0.387            | 2.427            | 10.177           | 3.240            |
| T278-50                            | AG    | >20              | >20              | 10.349           | >20              | >20              | >20              | >20              | >20              | >20              | >20              | >20              | >20              | 0.942            | 5.436            | >20              | >20              |
| T255-34                            | AG    | 0.042            | 0.292            | 0.793            | 15.424           | >20              | >20              | 0.147            | 0.682            | 0.042            | 0.205            | 0.435            | 1.664            | 0.380            | >20              | 9.198            | >20              |
| 211-9                              | AG    | 0.076            | 0.283            | 0.422            | 2.072            | >20              | >20              | 0.358            | 2.182            | 0.346            | 1.197            | 16.437           | >20              | 0.108            | 0.445            | 0.997            | 7.298            |
| 235-47                             | AG    | 0.007            | 0.027            | 0.015            | 0.072            | 0.027            | 0.166            | 0.020            | 0.069            | 0.025            | 0.158            | 0.044            | 0.169            | 0.019            | 0.137            | 0.184            | 1.116            |
| CNE19                              | BC    | 0.006            | 0.022            | 0.011            | 0.040            | 0.006            | 0.028            | 0.055            | 0.188            | 0.023            | 0.099            | 0.245            | 0.861            | 0.199            | >20              | 0.008            | 0.080            |
| CNE20                              | BC    | 0.033            | 0.149            | 0.060            | 0.275            | 0.007            | 0.047            | 0.025            | 0.108            | >20              | >20              | 8.270            | >20              | 0.001            | 0.006            | 0.001            | 0.007            |
| CNE21                              | BC    | 0.039            | 0.185            | 0.056            | 0.230            | 0.017            | 0.064            | 0.067            | 0.346            | 19.054           | >20              | 0.441            | 1.382            | 0.043            | 0.141            | 0.008            | 0.025            |
| CNE17                              | BC    | 0.157            | 0.566            | 15.490           | >20              | 0.086            | 0.481            | 0.328            | 1.219            | 4.893            | >20              | 1.541            | 4.030            | 1.791            | 6.820            | 9.777            | >20              |
| CNE30                              | BC    | 0.076            | 0.274            | 0.150            | 0.635            | 0.075            | 0.269            | 0.291            | 1.039            | 0.336            | 1.112            | 0.825            | 2.582            | 0.299            | 0.948            | 0.077            | 0.291            |
| CNE52                              | BC    | 0.007            | 0.026            | 0.011            | 0.038            | 0.003            | 0.014            | 0.052            | 0.144            | 0.027            | 0.092            | 0.215            | 0.595            | 1.887            | 10.909           | 2.843            | >20              |
| CNE53                              | BC    | 0.089            | 0.317            | 0.215            | 0.956            | 0.032            | 0.116            | 0.109            | 0.366            | 0.066            | 0.567            | 0.104            | 0.301            | 0.008            | 0.059            | 0.013            | 0.068            |
| CNE58                              | BC    | 0.017            | 0.050            | 0.027            | 0.064            | 0.009            | 0.028            | 0.040            | 0.131            | 0.360            | 2.338            | 0.164            | 0.456            | 0.139            | 0.548            | >20              | >20              |
| 3817.v2.c59                        | CD    | 0.131            | 0.540            | 0.725            | 3.717            | 2.284            | >20              | 0.562            | 3.584            | 0.197            | 0.636            | >20              | >20              | 0.734            | 5.714            | 18.892           | >20              |
| 6480.v4.c25                        | CD    | 0.023            | 0.083            | 0.013            | 0.062            | 0.025            | 0.074            | 0.038            | 0.136            | 0.010            | 0.040            | 0.040            | 0.090            | 0.006            | 0.028            | 0.003            | 0.041            |
| 6952.v1.c20                        | CD    | 0.035            | 0.182            | 0.309            | 1.834            | 0.020            | 0.100            | 0.022            | 0.072            | 0.120            | 0.440            | 0.050            | 0.149            | 0.016            | 0.069            | 0.060            | 0.418            |
| 6811.v7.c18                        | CD    | 0.042            | 0.227            | 0.066            | 0.288            | 0.074            | 0.676            | 0.069            | 0.235            | 0.038            | 0.185            | 0.168            | 0.493            | 0.002            | 0.009            | 0.002            | 0.009            |
| 89-F1_2_25                         | CD    | 0.007            | 0.023            | 0.014            | 0.039            | 0.006            | 0.025            | >20              | >20              | >20              | >20              | >20              | >20              | >20              | >20              | >20              | >20              |
| 0815.v3.c3                         | ACD   | 0.009            | 0.044            | 0.011            | 0.047            | 0.003            | 0.014            | 0.017            | 0.080            | 0.015            | 0.037            | 0.040            | 0.103            | 0.022            | 0.146            | 0.020            | 0.080            |
| 3103.v3.c10                        | ACD   | 0.050            | 0.144            | 0.146            | 0.453            | 18.167           | >20              | 0.331            | 1.223            | 0.270            | 1.023            | 1.193            | 3.179            | 0.020            | 0.057            | 0.017            | 0.084            |
| GeoMean of Neutralized Breadth (%) |       | 0.048            | 0.183            | 0.096            | 0.346            | 0.053            | 0.188            | 0.086            | 0.314            | 0.111            | 0.339            | 0.349            | 0.994            | 0.049            | 0.166            | 0.066            | 0.169            |
|                                    |       | 96.6             | 94.1             | 92.4             | 87.4             | 86.6             | 78.2             | 97.5             | 95.0             | 88.2             | 83.2             | 89.9             | 85.7             | 61.3             | 56.3             | 65.5             | 57.1             |

N6 neutralization data were determined in the same laboratory as data for 1-18 family members, except for 6405.v4.c34 and 0330\_V4\_C3 which were derived from CATNAP. VRC01 neutralization data were derived from CATNAP except for four strains that were tested in the same laboratory as 1-18 family members (249M B10, 89-F1\_2\_25, BJOX015000.11.1, and 231966.c02). 3BNC117, 10-1074, and PGT121 neutralization data were derived from CATNAP. 1-55 tested on the 119-panel was based on earlier sequence variants and contained primer-induced mutations at the start and end of the V genes (VH: 2 aa mut., Vk: 4 aa mut.).

|                                |      |           |         |         |         |         |     |
|--------------------------------|------|-----------|---------|---------|---------|---------|-----|
| Antibody concentration (µg/ml) | <0.1 | 0.1 - 0.5 | 0.5 - 1 | 1 - 2   | 2 - 5   | 5 - 10  | >10 |
| Breadth (%)                    | >95  | 90 - 95   | 80 - 90 | 70 - 80 | 60 - 70 | 50 - 60 | <50 |

Table S5. Neutralizing Activity Against Multiclade, Clade C, and Primary Virus Panels, Related to Figure 2 (continued)

B 100 Pseudovirus Clade C Panel

Table with 15 columns: Virus, Clade, 561\_01\_18 (IC50, IC80), 561\_02\_12 (IC50, IC80), N6 (IC50, IC80), 3BNC117 (IC50, IC80), VRC01 (IC50, IC80), 10-1074 (IC50, IC80), and PGT121 (IC50, IC80). Rows include various virus strains like 0041\_V3\_C18, 0933\_V4\_C4, etc., with corresponding neutralization values.

**Table S5. Neutralizing Activity Against Multiclade, Clade C, and Primary Virus Panels, Related to Figure 2 (continued)**

100 Pseudovirus Clade C Panel (continued)

| Virus                              | Clade | 561_01_18        |                  | 561_02_12        |                  | N6               |                  | 3BNC117          |                  | VRC01            |                  | 10-1074          |                  | PGT121           |                  |
|------------------------------------|-------|------------------|------------------|------------------|------------------|------------------|------------------|------------------|------------------|------------------|------------------|------------------|------------------|------------------|------------------|
|                                    |       | IC <sub>50</sub> | IC <sub>80</sub> | IC <sub>50</sub> | IC <sub>80</sub> | IC <sub>50</sub> | IC <sub>80</sub> | IC <sub>50</sub> | IC <sub>80</sub> | IC <sub>50</sub> | IC <sub>80</sub> | IC <sub>50</sub> | IC <sub>80</sub> | IC <sub>50</sub> | IC <sub>80</sub> |
| CT810_G4_7                         | C     | 0.071            | 0.361            | >20              | >20              | 0.100            | 0.450            | 1.191            | 8.124            | 0.510            | 1.920            | 0.264            | 0.912            | 0.053            | 0.286            |
| CT966_E1_7                         | C     | 0.057            | 0.234            | 0.177            | 1.006            | 0.038            | 0.156            | 0.200            | 0.702            | 0.560            | 2.940            | >20              | >20              | 7.854            | >20              |
| DU422_1                            | C     | 0.063            | 0.216            | 0.050            | 0.238            | 0.030            | 0.156            | >20              | >20              | >10              | >10              | 0.041            | 0.153            | 0.045            | 0.173            |
| KO426_T78_10                       | C     | 0.056            | 0.146            | 0.097            | 0.313            | 0.136            | 0.409            | 0.141            | 0.428            | 1.089            | 4.167            | 0.060            | 0.185            | 10.178           | >20              |
| KO459_T68_4                        | C     | 0.159            | 0.524            | 0.642            | 5.878            | 0.156            | 0.415            | 0.173            | 0.570            | 1.270            | 5.570            | 0.043            | 0.117            | 0.063            | 0.357            |
| KO870_C2_10                        | C     | 0.157            | 0.358            | 0.064            | 0.180            | 0.042            | 0.117            | 0.131            | 0.433            | 0.230            | 0.870            | >20              | >20              | >20              | >20              |
| ME178_G6_16                        | C     | 0.176            | 0.600            | 0.122            | 0.559            | 0.119            | 0.520            | 0.425            | 2.100            | 0.400            | 1.380            | 0.018            | 0.055            | 0.099            | 0.574            |
| SO032_A2_8_1                       | C     | 0.035            | 0.133            | >20              | >20              | 0.147            | 0.533            | 4.873            | >20              | 1.980            | >10              | 0.005            | 0.015            | 0.004            | 0.012            |
| SO405_T24_5                        | C     | 0.073            | 0.225            | 0.292            | 1.090            | 0.279            | 1.274            | 0.330            | 0.872            | 3.410            | >10              | 0.001            | 0.005            | 0.007            | 0.019            |
| SO431_C1_1                         | C     | 0.018            | 0.083            | 0.011            | 0.082            | 0.003            | 0.020            | 0.198            | 5.198            | 0.560            | 3.640            | >20              | >20              | 0.025            | 0.183            |
| SO607_B6_9                         | C     | 0.071            | 0.257            | 0.049            | 0.233            | 0.131            | 0.347            | 0.124            | 0.433            | 0.490            | 1.740            | >20              | >20              | >20              | >20              |
| ZM106_9                            | C     | 0.011            | 0.035            | 0.071            | 0.296            | 0.026            | 0.093            | 0.076            | 0.277            | 0.254            | 0.714            | 0.008            | 0.042            | 0.003            | 0.016            |
| ZM135_10A                          | C     | 1.729            | 13.124           | >20              | >20              | 0.144            | 0.430            | 0.056            | 0.205            | 0.899            | 5.016            | 0.066            | 0.331            | 0.897            | 6.359            |
| ZM197_7                            | C     | 0.091            | 0.321            | 0.137            | 0.714            | 0.061            | 0.342            | 0.335            | 1.145            | 0.516            | 1.673            | >20              | >20              | >20              | >20              |
| ZM214_15                           | C     | 0.048            | 0.654            | 0.007            | 0.076            | 0.071            | 0.369            | 0.091            | 0.692            | 0.821            | 3.344            | 0.411            | 2.752            | 0.464            | 2.353            |
| ZM215_8                            | C     | 0.039            | 0.205            | 0.027            | 0.193            | 0.043            | 0.199            | 0.013            | 0.086            | 0.166            | 0.839            | 0.007            | 0.061            | 0.012            | 0.052            |
| ZM233_6                            | C     | 0.042            | 0.159            | 0.438            | 6.876            | 0.066            | 0.210            | 0.191            | 0.901            | 2.527            | 10.823           | 0.021            | 0.348            | 2.311            | 2.673            |
| ZM249_1                            | C     | 0.020            | 0.073            | 5.632            | >20              | 0.019            | 0.074            | 0.041            | 0.186            | 0.073            | 0.272            | >20              | >20              | 3.200            | >20              |
| GeoMean of Neutralized Breadth (%) |       | 0.074            | 0.279            | 0.084            | 0.316            | 0.062            | 0.201            | 0.259            | 0.613            | 0.471            | 1.374            | 0.050            | 0.154            | 0.087            | 0.201            |
|                                    |       | 90.0             | 88.0             | 74.0             | 68.0             | 97.0             | 95.0             | 81.0             | 66.0             | 76.0             | 64.0             | 63.0             | 60.0             | 72.0             | 63.0             |

N6, 3BNC117, VRC01, 10-1074, and PGT121 neutralization data were derived from CATNAP.

|                                |      |           |         |         |         |         |     |
|--------------------------------|------|-----------|---------|---------|---------|---------|-----|
| Antibody concentration (µg/ml) | <0.1 | 0.1 - 0.5 | 0.5 - 1 | 1 - 2   | 2 - 5   | 5 - 10  | >10 |
| Breadth (%)                    | >95  | 90 - 95   | 80 - 90 | 70 - 80 | 60 - 70 | 50 - 60 | <50 |

**Table S5. Neutralizing Activity Against Multiclade, Clade C, and Primary Virus Panels, Related to Figure 2 (continued)**

**C** 51 Outgrowth Culture-Derived Viruses

| Virus                              | Clade | 561_01_18        |                  | 561_01_55        |                  | N6               |                  | 3BNC117          |                  | VRC01            |                  | 10-1074          |                  | PGDM1400         |                  |
|------------------------------------|-------|------------------|------------------|------------------|------------------|------------------|------------------|------------------|------------------|------------------|------------------|------------------|------------------|------------------|------------------|
|                                    |       | IC <sub>50</sub> | IC <sub>80</sub> | IC <sub>50</sub> | IC <sub>80</sub> | IC <sub>50</sub> | IC <sub>80</sub> | IC <sub>50</sub> | IC <sub>80</sub> | IC <sub>50</sub> | IC <sub>80</sub> | IC <sub>50</sub> | IC <sub>80</sub> | IC <sub>50</sub> | IC <sub>80</sub> |
| IDC#0355                           | AG    | 1.461            | 3.205            | 1.432            | 3.608            | 2.127            | 7.093            | 6.871            | >20              | 10.211           | >20              | 0.095            | 0.267            | 5.903            | >20              |
| IDC#0763                           | AG    | 0.085            | 0.237            | 0.064            | 0.218            | 0.261            | 0.761            | 0.408            | 1.119            | 0.517            | 1.829            | 0.115            | 0.279            | 4.480            | 19.040           |
| IDC#0034                           | B     | 2.228            | 5.254            | 2.007            | 5.646            | 3.683            | 12.057           | 1.995            | 6.491            | >20              | >20              | 0.029            | 0.078            | >20              | >20              |
| IDC#0039                           | B     | 2.474            | 6.289            | 2.989            | 8.410            | 5.398            | >20              | 9.121            | >20              | >20              | >20              | >20              | >20              | >20              | >20              |
| IDC#0049                           | B     | 0.225            | 0.579            | 0.224            | 0.633            | 0.257            | 0.773            | 0.277            | 1.588            | 0.471            | 1.468            | >20              | >20              | >20              | >20              |
| IDC#0052                           | B     | 0.753            | 2.174            | 0.671            | 2.118            | 0.600            | 3.084            | 1.060            | 4.010            | 2.778            | 12.760           | 0.377            | 0.846            | 1.453            | 3.657            |
| IDC#0114                           | B     | 1.193            | 3.752            | 1.203            | 4.837            | 3.157            | 15.679           | 1.492            | 6.716            | 11.891           | >20              | <0.010           | 0.041            | 0.092            | 0.596            |
| IDC#0115                           | B     | 0.160            | 0.682            | 0.210            | 0.717            | 1.317            | 4.956            | 0.382            | 1.737            | 2.459            | 16.411           | <0.010           | 0.017            | >20              | >20              |
| IDC#0170                           | B     | <0.010           | 0.017            | <0.010           | 0.068            | 0.073            | 0.371            | 0.071            | 0.432            | 0.208            | 0.907            | 1.618            | 10.670           | >20              | >20              |
| IDC#0171                           | B     | 0.162            | 0.403            | 0.227            | 0.627            | 2.196            | 7.958            | 0.601            | 2.336            | 8.549            | >20              | 0.293            | 0.730            | >20              | >20              |
| IDC#0176                           | B     | 1.399            | 2.722            | 2.076            | 5.159            | 3.276            | 14.943           | 1.010            | 5.675            | 17.053           | >20              | 0.412            | 1.089            | 0.325            | 1.775            |
| IDC#0183                           | B     | 0.542            | 1.927            | 0.660            | 2.295            | 0.474            | 3.203            | 5.017            | >20              | 2.218            | >20              | 0.585            | 2.128            | >20              | >20              |
| IDC#0190                           | B     | 0.054            | 0.198            | 0.081            | 0.272            | 0.564            | 1.546            | 0.287            | 1.220            | 1.877            | 8.138            | 0.100            | 0.377            | 1.504            | 7.405            |
| IDC#0213                           | B     | 2.554            | 6.397            | 2.317            | 7.688            | 19.416           | >20              | 2.667            | 17.200           | >20              | >20              | 0.354            | 0.906            | 0.210            | 6.623            |
| IDC#0228                           | B     | 4.784            | 11.207           | 8.618            | >20              | 7.813            | >20              | 2.300            | 9.107            | >20              | >20              | 1.774            | 15.570           | >20              | >20              |
| IDC#0230                           | B     | 0.210            | 1.208            | 0.510            | 2.413            | 1.583            | 7.546            | 1.334            | 12.872           | 6.322            | >20              | 0.060            | 0.915            | >20              | >20              |
| IDC#0233                           | B     | 5.477            | >20              | 2.562            | 8.446            | >20              | >20              | 1.606            | 8.980            | >20              | >20              | 5.466            | >20              | >20              | >20              |
| IDC#0246                           | B     | 2.368            | 6.492            | 1.925            | 6.026            | 12.309           | >20              | 3.589            | 14.560           | >20              | >20              | 1.447            | 3.726            | 1.104            | 4.957            |
| IDC#0261                           | B     | 0.604            | 1.809            | 0.995            | 2.619            | 0.585            | 2.832            | 0.503            | 3.235            | 1.210            | 7.087            | 2.043            | 8.232            | 0.401            | 1.938            |
| IDC#0338                           | B     | 0.127            | 0.376            | 0.217            | 0.614            | 0.514            | 1.960            | 0.209            | 0.853            | 2.049            | 9.573            | 0.044            | 0.170            | 18.149           | >20              |
| IDC#0362                           | B     | 0.208            | 0.608            | 0.340            | 0.856            | 0.373            | 1.107            | 0.087            | 0.349            | 0.719            | 2.685            | 0.267            | >20              | 1.229            | >20              |
| IDC#0365                           | B     | 0.315            | 0.838            | 0.396            | 1.021            | 0.673            | 2.012            | 0.440            | 1.481            | 1.938            | 6.335            | <0.010           | 0.028            | >20              | >20              |
| IDC#0403                           | B     | 6.062            | 15.186           | 9.595            | >20              | 2.213            | 9.314            | >20              | >20              | >20              | >20              | 0.896            | 3.040            | 6.140            | >20              |
| IDC#0428                           | B     | 2.926            | 9.014            | 3.945            | 10.286           | 1.190            | 2.930            | 2.290            | 6.772            | 2.690            | 9.648            | 0.477            | 7.845            | 2.659            | >20              |
| IDC#0438                           | B     | 0.462            | 1.225            | 0.470            | 1.219            | 3.592            | 9.314            | 1.676            | 5.611            | 6.402            | >20              | 0.024            | 0.120            | >20              | >20              |
| IDC#0440                           | B     | 2.248            | 5.670            | 2.005            | 5.270            | 3.678            | 16.480           | 1.649            | 6.151            | 12.071           | >20              | >20              | >20              | 0.289            | 1.750            |
| IDC#0449                           | B     | 0.195            | 0.482            | 0.200            | 0.526            | 1.100            | 5.061            | 0.282            | 1.589            | 3.544            | 17.233           | 0.046            | 0.125            | 0.250            | 0.807            |
| IDC#0453                           | B     | 1.626            | 4.447            | 1.668            | 4.049            | 2.117            | 6.169            | 1.467            | 4.291            | 10.605           | >20              | 0.415            | 1.033            | 0.337            | >20              |
| IDC#0460                           | B     | 0.141            | 0.433            | 0.174            | 0.640            | 0.461            | 1.689            | >20              | >20              | >20              | >20              | 0.417            | 1.560            | >20              | >20              |
| IDC#0464                           | B     | 0.202            | 1.016            | 0.337            | 1.201            | 0.236            | 1.330            | 0.495            | 2.536            | 1.215            | 5.483            | 2.762            | >20              | <0.010           | >20              |
| IDC#0467                           | B     | 0.205            | 0.696            | 0.283            | 0.997            | 0.381            | 1.358            | 0.530            | 2.064            | 3.242            | 14.350           | 0.109            | 0.426            | 0.317            | 1.900            |
| IDC#0480                           | B     | 0.191            | 0.668            | 0.369            | 0.865            | 0.896            | 2.158            | 0.872            | 2.571            | 2.050            | 6.449            | 0.081            | 0.250            | 0.103            | 0.431            |
| IDC#0527                           | B     | >20              | >20              | >20              | >20              | >20              | >20              | >20              | >20              | >20              | >20              | >20              | >20              | >20              | >20              |
| IDC#0535                           | B     | 0.484            | 1.495            | 0.648            | 2.162            | 0.965            | 2.671            | 0.622            | 1.530            | 1.171            | 5.692            | 0.740            | 2.123            | 0.606            | 18.190           |
| IDC#0540                           | B     | 1.331            | 3.092            | 1.729            | 4.460            | 2.878            | 9.422            | 1.355            | 3.861            | 7.124            | >20              | 0.552            | 1.767            | 1.305            | 6.870            |
| IDC#0541                           | B     | 0.566            | 2.039            | 1.118            | 2.458            | 8.265            | 19.597           | 3.331            | 7.394            | 19.438           | >20              | 0.293            | 0.727            | >20              | >20              |
| IDC#0548                           | B     | 0.163            | 0.547            | 0.282            | 0.764            | 1.696            | 4.501            | 0.985            | 2.541            | 7.670            | >20              | 0.079            | 0.305            | <0.010           | <0.010           |
| IDC#0551                           | B     | 0.995            | 2.497            | 1.333            | 3.006            | 1.153            | 2.923            | 0.230            | 0.694            | 1.550            | 4.865            | 2.635            | 6.679            | >20              | >20              |
| IDC#0578                           | B     | 0.119            | 0.277            | 0.182            | 0.664            | 0.266            | 0.748            | >20              | >20              | 0.491            | 2.094            | 0.736            | 1.973            | 1.527            | 8.611            |
| IDC#0579                           | B     | 0.185            | 0.525            | 0.315            | 0.917            | 0.766            | 2.150            | >20              | >20              | >20              | >20              | 2.072            | >20              | 1.516            | >20              |
| IDC#0615                           | B     | 0.558            | 1.654            | 1.201            | 2.309            | 2.912            | 7.215            | 0.415            | 1.355            | 4.980            | 17.759           | >20              | >20              | 2.405            | 6.679            |
| IDC#0648                           | B     | 0.554            | 1.762            | 0.958            | 2.501            | 1.340            | 4.197            | 0.423            | 1.172            | 1.578            | 8.994            | 0.078            | 0.334            | 1.952            | 7.911            |
| IDC#0683                           | B     | 4.107            | 11.123           | 5.080            | 14.716           | 5.334            | 18.067           | 1.873            | 6.689            | 11.529           | >20              | >20              | >20              | 0.720            | 2.661            |
| IDC#0758                           | B     | 0.291            | 0.756            | 0.656            | 2.490            | 0.457            | 1.361            | >20              | >20              | >20              | >20              | 5.610            | >20              | 3.726            | 13.729           |
| IDC#0761                           | B     | 0.471            | 1.213            | 0.574            | 1.932            | 0.674            | 2.181            | 1.554            | 7.146            | 1.259            | 5.396            | >20              | >20              | 0.119            | 13.561           |
| IDC#0779                           | B     | 0.888            | 8.496            | 1.049            | 4.104            | 11.159           | 17.434           | >20              | >20              | 2.689            | 10.735           | >20              | >20              | 0.462            | 1.992            |
| IDC#0787                           | B     | 0.051            | 0.203            | 0.075            | 0.273            | 0.293            | 1.016            | 0.112            | 0.383            | 1.292            | 3.901            | 0.066            | 0.248            | >20              | >20              |
| IDC#0799                           | B     | 1.605            | 5.506            | 4.690            | 13.625           | 0.659            | 1.925            | 1.482            | 4.547            | 3.819            | >20              | 8.033            | 18.912           | >20              | >20              |
| IDC#0801                           | B     | 2.457            | 6.553            | 2.534            | 10.521           | 1.973            | 5.450            | 1.374            | 3.889            | 5.114            | >20              | >20              | >20              | 14.317           | >20              |
| IDC#0782                           | C     | 4.684            | 14.871           | >20              | >20              | 3.520            | 9.252            | >20              | >20              | >20              | >20              | 12.929           | >20              | 17.801           | >20              |
| IDC#0508                           | D     | >20              | >20              | >20              | >20              | >20              | >20              | >20              | >20              | >20              | >20              | >20              | >20              | >20              | >20              |
| GeoMean of Neutralized Breadth (%) |       | 0.555            | 1.568            | 0.698            | 1.899            | 1.319            | 3.659            | 0.879            | 2.908            | 2.872            | 6.018            | 0.313            | 0.752            | 0.816            | 2.955            |
|                                    |       | 96.1             | 94.1             | 94.1             | 90.2             | 94.1             | 86.3             | 82.4             | 76.5             | 76.5             | 45.1             | 80.4             | 68.6             | 62.7             | 43.1             |

|                                |      |           |         |         |         |         |     |
|--------------------------------|------|-----------|---------|---------|---------|---------|-----|
| Antibody concentration (µg/ml) | <0.1 | 0.1 - 0.5 | 0.5 - 1 | 1 - 2   | 2 - 5   | 5 - 10  | >10 |
| Breadth (%)                    | >95  | 90 - 95   | 80 - 90 | 70 - 80 | 60 - 70 | 50 - 60 | <50 |
