# Supplementary material for: Restriction of HIV-1 Escape by a Highly Broad and Potent Neutralizing Antibody
Source: PubMed Central journal article supplement (PMC7042716; doi:10.1016/j.cell.2020.01.010), 2020-02-06
Supplement: mmc6.pdf [file mmc6.pdf]

**Table S6. Cryo-EM Data Collection, Refinement, and Validation Statistics, Related to Figure 3**

|                                                  | <b>1-18-BG505-10-1074</b>      | <b>1-55-RC1-10-1074</b>      |
|--------------------------------------------------|--------------------------------|------------------------------|
|                                                  | (EMDB-20739)                   | (EMDB-20740)                 |
|                                                  | (PDB 6UDJ)                     | (PDB 6UDK)                   |
| <b>Data collection and processing</b>            |                                |                              |
| Magnification                                    | 130,000x                       | 73,000x                      |
| Voltage (kV)                                     | 300                            | 200                          |
| Microscope                                       | Titan Krios                    | Talos Arctica                |
| Electron exposure (e-/Å <sup>2</sup> )           | 60                             | 39.1                         |
| Defocus range (µm)                               | 1 - 2.6                        | 1 - 3.4                      |
| Pixel size (Å)                                   | 1.057                          | 1.40                         |
| Symmetry imposed                                 | C3                             | C3                           |
| Initial particle images (no.)                    | 352,598                        | 160,254                      |
| Final particle images (no.)                      | 230,924                        | 110,126                      |
| Map resolution (Å)                               | 2.5                            | 3.9                          |
| FSC threshold                                    | 0.143                          | 0.143                        |
| <b>Refinement</b>                                |                                |                              |
| Initial model used (PDB code)                    | ab initio                      | 5T3Z                         |
| Model resolution (Å)                             | 2.5                            | 3.9                          |
| FSC threshold                                    | 0.143                          | 0.143                        |
| Map sharpening <i>B</i> factor (Å <sup>2</sup> ) | -71.0                          | -272.3                       |
| <b>Model composition</b>                         |                                |                              |
| Non-hydrogen atoms (no.)                         | 26,592                         | 25,724                       |
| Protein residues (no.)                           | 3,090                          | 3,129                        |
| Ligands                                          | BMA: 27<br>NAG: 105<br>MAN: 45 | BMA: 8<br>NAG: 57<br>MAN: 23 |
| <b><i>B</i> factors</b>                          |                                |                              |
| Protein (Å <sup>2</sup> )                        | 42.53                          | 42.31                        |
| Ligand (Å <sup>2</sup> )                         | 62.19                          | 48.20                        |
| <b>R.m.s. deviations</b>                         |                                |                              |
| Bond lengths (Å)                                 | 0.010                          | 0.004                        |
| Bond angles (°)                                  | 1.071                          | 0.809                        |
| <b>Validation</b>                                |                                |                              |
| MolProbity score                                 | 1.39                           | 1.62                         |
| Clashscore                                       | 3.07                           | 4.88                         |
| Poor rotamers (%)                                | 0.41                           | 0.52                         |
| <b>Ramachandran plot</b>                         |                                |                              |
| Favored (%)                                      | 95.83                          | 94.71                        |
| Allowed (%)                                      | 4.11                           | 5.22                         |
| Disallowed (%)                                   | 0.07                           | 0.07                         |
