# Supplementary material for: Restriction of HIV-1 Escape by a Highly Broad and Potent Neutralizing Antibody
Source: PubMed Central journal article supplement (PMC7042716; doi:10.1016/j.cell.2020.01.010), 2020-02-06
Supplement: mmc7.pdf [file mmc7.pdf]

**Table S7. Plasma SGS-Derived env Sequences Obtained from HIV-1<sub>YU2</sub>-Infected Humanized Mice and Antibody Sensitivity, Related to Figures 6 and 7 (continued)**

**B VRC01 Treatment Group**

| ID                                                                                                                                                                                                                                                                                                                                                                                                                                              | Day | Virus  | Sensitivity      |     |                  |     | V1 loop | V2 loop | Loop D | V3 loop | CD4 binding loop | V4 loop | β20/β21 | β23 | V5/β24 |                  |     |
|-------------------------------------------------------------------------------------------------------------------------------------------------------------------------------------------------------------------------------------------------------------------------------------------------------------------------------------------------------------------------------------------------------------------------------------------------|-----|--------|------------------|-----|------------------|-----|---------|---------|--------|---------|------------------|---------|---------|-----|--------|------------------|-----|
|                                                                                                                                                                                                                                                                                                                                                                                                                                                 |     |        | 1-18             |     | 3BNC117          |     |         |         |        |         |                  |         |         |     |        | VRC01            |     |
|                                                                                                                                                                                                                                                                                                                                                                                                                                                 |     |        | IC <sub>50</sub> | MPI | IC <sub>50</sub> | MPI |         |         |        |         |                  |         |         |     |        | IC <sub>50</sub> | MPI |
| <small>T D L R N A T N T T S S W E T M E K G E I K N C S F N I T T S I R D K V Q E Y A L F Y N L D V V P I D N A S Y R L I S C N T S V I T Q A C P K V S<br/> S E N F T N N A K T I<br/> R P N N T R K S I N I G P G R A L Y T T G E I I G D I R Q A H C<br/> P S S G D P E I V T H S<br/> C N S T Q L F T W N D T R K L N N T G R N I T L P C R I K Q I I N M W Q E V G K A M Y A P F<br/> T G L L L T R D G G K D T N G T E I F R P G</small> |     |        |                  |     |                  |     |         |         |        |         |                  |         |         |     |        |                  |     |
| 1080                                                                                                                                                                                                                                                                                                                                                                                                                                            | -1  | 12-A05 | n/a              | n/a | n/a              | n/a | n/a     | n/a     |        |         |                  |         |         |     |        |                  |     |
|                                                                                                                                                                                                                                                                                                                                                                                                                                                 |     | 12-B11 | n/a              | n/a | n/a              | n/a | n/a     | n/a     | n/a    |         |                  |         |         |     |        |                  |     |
|                                                                                                                                                                                                                                                                                                                                                                                                                                                 |     | 17-A10 | n/a              | n/a | n/a              | n/a | n/a     | n/a     | n/a    |         |                  |         |         |     |        |                  |     |
|                                                                                                                                                                                                                                                                                                                                                                                                                                                 |     | 17-A11 | <0.01            | 100 | <0.01            | 100 | 0.043   | 100     |        |         |                  |         |         |     |        |                  |     |
|                                                                                                                                                                                                                                                                                                                                                                                                                                                 |     | 17-B09 | n/a              | n/a | n/a              | n/a | n/a     | n/a     |        |         |                  |         |         |     |        |                  |     |
|                                                                                                                                                                                                                                                                                                                                                                                                                                                 |     | 14-E03 | n/a              | n/a | n/a              | n/a | n/a     | n/a     |        |         |                  |         |         |     |        |                  |     |
| 1130                                                                                                                                                                                                                                                                                                                                                                                                                                            | -1  | 12-C07 | n/a              | n/a | n/a              | n/a | n/a     | n/a     |        |         |                  |         |         |     |        |                  |     |
|                                                                                                                                                                                                                                                                                                                                                                                                                                                 |     | 12-D01 | n/a              | n/a | n/a              | n/a | n/a     | n/a     |        |         |                  |         |         |     |        |                  |     |
|                                                                                                                                                                                                                                                                                                                                                                                                                                                 |     | 12-D05 | n/a              | n/a | n/a              | n/a | n/a     | n/a     |        |         |                  |         |         |     |        |                  |     |
|                                                                                                                                                                                                                                                                                                                                                                                                                                                 |     | 17-C07 | n/a              | n/a | n/a              | n/a | n/a     | n/a     |        |         |                  |         |         |     |        |                  |     |
|                                                                                                                                                                                                                                                                                                                                                                                                                                                 |     | 17-D08 | n/a              | n/a | n/a              | n/a | n/a     | n/a     |        |         |                  |         |         |     |        |                  |     |
|                                                                                                                                                                                                                                                                                                                                                                                                                                                 |     | 14-G02 | <0.01            | 81  | 0.025            | 77  | 0.203   | 81      |        |         |                  |         |         |     |        |                  |     |
| 114                                                                                                                                                                                                                                                                                                                                                                                                                                             | 28  | 14-G05 | n/a              | n/a | n/a              | n/a | n/a     | n/a     |        |         |                  |         |         |     |        |                  |     |
|                                                                                                                                                                                                                                                                                                                                                                                                                                                 |     | 14-G11 | n/a              | n/a | n/a              | n/a | n/a     | n/a     |        |         |                  |         |         |     |        |                  |     |
|                                                                                                                                                                                                                                                                                                                                                                                                                                                 |     | 19-H01 | n/a              | n/a | n/a              | n/a | n/a     | n/a     |        |         |                  |         |         |     |        |                  |     |
|                                                                                                                                                                                                                                                                                                                                                                                                                                                 |     | 19-H02 | n/a              | n/a | n/a              | n/a | n/a     | n/a     |        |         |                  |         |         |     |        |                  |     |
|                                                                                                                                                                                                                                                                                                                                                                                                                                                 |     | 19-H06 | n/a              | n/a | n/a              | n/a | n/a     | n/a     |        |         |                  |         |         |     |        |                  |     |
|                                                                                                                                                                                                                                                                                                                                                                                                                                                 |     | 19-H10 | <0.01            | 95  | 1.243            | 67  | >25     | 28      |        |         |                  |         |         |     |        |                  |     |
|                                                                                                                                                                                                                                                                                                                                                                                                                                                 |     | 25-C01 | n/a              | n/a | n/a              | n/a | n/a     | n/a     |        |         |                  |         |         |     |        |                  |     |
|                                                                                                                                                                                                                                                                                                                                                                                                                                                 |     | 25-C02 | n/a              | n/a | n/a              | n/a | n/a     | n/a     |        |         |                  |         |         |     |        |                  |     |
|                                                                                                                                                                                                                                                                                                                                                                                                                                                 |     | 25-C11 | n/a              | n/a | n/a              | n/a | n/a     | n/a     |        |         |                  |         |         |     |        |                  |     |
|                                                                                                                                                                                                                                                                                                                                                                                                                                                 |     | 25-D07 | n/a              | n/a | n/a              | n/a | n/a     | n/a     |        |         |                  |         |         |     |        |                  |     |
| 1161                                                                                                                                                                                                                                                                                                                                                                                                                                            | -1  | 02-82  | n/a              | n/a | n/a              | n/a | n/a     | n/a     |        |         |                  |         |         |     |        |                  |     |
|                                                                                                                                                                                                                                                                                                                                                                                                                                                 |     | 02-84  | n/a              | n/a | n/a              | n/a | n/a     | n/a     |        |         |                  |         |         |     |        |                  |     |
|                                                                                                                                                                                                                                                                                                                                                                                                                                                 |     | 04-73  | n/a              | n/a | n/a              | n/a | n/a     | n/a     |        |         |                  |         |         |     |        |                  |     |
|                                                                                                                                                                                                                                                                                                                                                                                                                                                 |     | 04-93  | <0.01            | 100 | 0.412            | 80  | 9.639   | 74      |        |         |                  |         |         |     |        |                  |     |
| 1210                                                                                                                                                                                                                                                                                                                                                                                                                                            | -1  | 09-G04 | n/a              | n/a | n/a              | n/a | n/a     | n/a     |        |         |                  |         |         |     |        |                  |     |
|                                                                                                                                                                                                                                                                                                                                                                                                                                                 |     | 09-G07 | n/a              | n/a | n/a              | n/a | n/a     | n/a     |        |         |                  |         |         |     |        |                  |     |
|                                                                                                                                                                                                                                                                                                                                                                                                                                                 |     | 09-G09 | n/a              | n/a | n/a              | n/a | n/a     | n/a     |        |         |                  |         |         |     |        |                  |     |
|                                                                                                                                                                                                                                                                                                                                                                                                                                                 |     | 09-H01 | n/a              | n/a | n/a              | n/a | n/a     | n/a     |        |         |                  |         |         |     |        |                  |     |
|                                                                                                                                                                                                                                                                                                                                                                                                                                                 |     | 09-H09 | n/a              | n/a | n/a              | n/a | n/a     | n/a     |        |         |                  |         |         |     |        |                  |     |
|                                                                                                                                                                                                                                                                                                                                                                                                                                                 |     | 25-A01 | <0.01            | 92  | 19.359           | 55  | 5.861   | 56      |        |         |                  |         |         |     |        |                  |     |
|                                                                                                                                                                                                                                                                                                                                                                                                                                                 |     | 25-A12 | 0.027            | 100 | 0.238            | 66  | 21.735  | 52      |        |         |                  |         |         |     |        |                  |     |
|                                                                                                                                                                                                                                                                                                                                                                                                                                                 |     | 33-A08 | n/a              | n/a | n/a              | n/a | n/a     | n/a     |        |         |                  |         |         |     |        |                  |     |
|                                                                                                                                                                                                                                                                                                                                                                                                                                                 |     | 33-A11 | n/a              | n/a | n/a              | n/a | n/a     | n/a     |        |         |                  |         |         |     |        |                  |     |
|                                                                                                                                                                                                                                                                                                                                                                                                                                                 |     | 33-B02 | n/a              | n/a | n/a              | n/a | n/a     | n/a     |        |         |                  |         |         |     |        |                  |     |
| 114                                                                                                                                                                                                                                                                                                                                                                                                                                             | 28  | 02-02  | n/a              | n/a | n/a              | n/a | n/a     | n/a     |        |         |                  |         |         |     |        |                  |     |
|                                                                                                                                                                                                                                                                                                                                                                                                                                                 |     | 02-04  | n/a              | n/a | n/a              | n/a | n/a     | n/a     |        |         |                  |         |         |     |        |                  |     |
|                                                                                                                                                                                                                                                                                                                                                                                                                                                 |     | 02-06  | n/a              | n/a | n/a              | n/a | n/a     | n/a     |        |         |                  |         |         |     |        |                  |     |
|                                                                                                                                                                                                                                                                                                                                                                                                                                                 |     | 02-07  | n/a              | n/a | n/a              | n/a | n/a     | n/a     |        |         |                  |         |         |     |        |                  |     |
|                                                                                                                                                                                                                                                                                                                                                                                                                                                 |     | 02-08  | n/a              | n/a | n/a              | n/a | n/a     | n/a     |        |         |                  |         |         |     |        |                  |     |
|                                                                                                                                                                                                                                                                                                                                                                                                                                                 |     | 02-12  | n/a              | n/a | n/a              | n/a | n/a     | n/a     |        |         |                  |         |         |     |        |                  |     |
|                                                                                                                                                                                                                                                                                                                                                                                                                                                 |     | 02-14  | n/a              | n/a | n/a              | n/a | n/a     | n/a     |        |         |                  |         |         |     |        |                  |     |
|                                                                                                                                                                                                                                                                                                                                                                                                                                                 |     | 02-20  | n/a              | n/a | n/a              | n/a | n/a     | n/a     |        |         |                  |         |         |     |        |                  |     |
|                                                                                                                                                                                                                                                                                                                                                                                                                                                 |     | 02-21  | n/a              | n/a | n/a              | n/a | n/a     | n/a     |        |         |                  |         |         |     |        |                  |     |
|                                                                                                                                                                                                                                                                                                                                                                                                                                                 |     | 04-01  | n/a              | n/a | n/a              | n/a | n/a     | n/a     |        |         |                  |         |         |     |        |                  |     |
|                                                                                                                                                                                                                                                                                                                                                                                                                                                 |     | 04-08  | n/a              | n/a | n/a              | n/a | n/a     | n/a     |        |         |                  |         |         |     |        |                  |     |
|                                                                                                                                                                                                                                                                                                                                                                                                                                                 |     | 04-23  | n/a              | n/a | n/a              | n/a | n/a     | n/a     |        |         |                  |         |         |     |        |                  |     |
|                                                                                                                                                                                                                                                                                                                                                                                                                                                 |     | 09-A08 | <0.01            | 100 | 22.647           | 52  | >25     | 45      |        |         |                  |         |         |     |        |                  |     |
|                                                                                                                                                                                                                                                                                                                                                                                                                                                 |     | 09-A11 | 0.022            | 100 | >25              | 38  | 25.000  | 50      |        |         |                  |         |         |     |        |                  |     |
| 09-A12                                                                                                                                                                                                                                                                                                                                                                                                                                          | n/a | n/a    | n/a              | n/a | n/a              | n/a |         |         |        |         |                  |         |         |     |        |                  |     |
| 09-B06                                                                                                                                                                                                                                                                                                                                                                                                                                          | n/a | n/a    | n/a              | n/a | n/a              | n/a |         |         |        |         |                  |         |         |     |        |                  |     |
| 114                                                                                                                                                                                                                                                                                                                                                                                                                                             | 28  | 24-G10 | n/a              | n/a | n/a              | n/a | n/a     | n/a     |        |         |                  |         |         |     |        |                  |     |
|                                                                                                                                                                                                                                                                                                                                                                                                                                                 |     | 24-H04 | n/a              | n/a | n/a              | n/a | n/a     | n/a     |        |         |                  |         |         |     |        |                  |     |
|                                                                                                                                                                                                                                                                                                                                                                                                                                                 |     | 32-G04 | <0.01            | 100 | 22.820           | 57  | >25     | 37      |        |         |                  |         |         |     |        |                  |     |
|                                                                                                                                                                                                                                                                                                                                                                                                                                                 |     | 32-G08 | <0.01            | 100 | <0.01            | 100 | 0.015   | 100     |        |         |                  |         |         |     |        |                  |     |
|                                                                                                                                                                                                                                                                                                                                                                                                                                                 |     | 32-H01 | n/a              | n/a | n/a              | n/a | n/a     | n/a     |        |         |                  |         |         |     |        |                  |     |
|                                                                                                                                                                                                                                                                                                                                                                                                                                                 |     | 32-H07 | n/a              | n/a | n/a              | n/a | n/a     | n/a     |        |         |                  |         |         |     |        |                  |     |
